# Supplementary material
Source: publisher figshare collection journal article supplement (https://gsajournals.figshare.com/ndownloader/files/24973190)
Supplement: Supplementary file 1 [file 24973190]

## Sheet: Raw phenotypic values
Ind	Years	Lots	F.Weight	Hue.g	Ethylene	RI	TA	Glucose	Fructose	Sucrose	Citric.A.	Malic.A.
GoMo-A002	2006	1	58	73.21	3.18	13.6	20.82	1.6	0.64	5.19	20.01	6.76
GoMo-A002	2006	2	58.4	71.48	5.04	14.4	19.02	1.65	0.71	6.09	17.87	6.18
GoMo-A002	2006	3	67.3	70.93	7.81	15.1	17.25	1.47	0.61	6.48	15.07	5
GoMo-A003	2006	1	60	70.26	3.4	13.6	22.06	1.98	0.87	6.38	19.15	7.67
GoMo-A003	2006	2	66.9	68.06	5.59	13.8	22.63	1.98	0.84	6.63	17.95	7.98
GoMo-A003	2006	3	70	68.73	4.42	15	20.28	1.97	0.81	8	17.24	7.94
GoMo-A004	2006	1	66.1	88.38	3.14	13.1	16.84	1.96	0.96	5.85	13.71	9.2
GoMo-A004	2006	2	73.9	86.19	3.14	13.5	13.46	2.45	1.16	9.52	13.35	11.06
GoMo-A004	2006	3	68.7	80.36	3.71	15.3	12.31	2.29	1.11	10.26	8.01	7.07
GoMo-A005	2006	1	57.2	84.09	8.54	13.3	34.88	1.52	0.8	8.89	33.78	12.97
GoMo-A005	2006	2	57.6	77.14	9.16	14.6	31.86	1.99	1.2	6.26	26.81	9.96
GoMo-A005	2006	3	58.2	70.99	9.42	14.9	28.24	1.96	0.99	8.93	23.07	9.16
GoMo-A006	2006	1	79	85.07	4.56	14.3	21.46	2.12	0.99	8.06	18.49	8.83
GoMo-A006	2006	2	79.4	83.29	5.78	14.7	21.27	1.82	0.88	7.98	15.96	7.92
GoMo-A006	2006	3	83.4	81.36	6.31	15.4	19.76	2.19	1.1	11.1	14.31	7.41
GoMo-A007	2006	1	68.8	71.53	3.56	12.9	19.37	2	0.65	7.42	14.77	7.2
GoMo-A007	2006	2	61.7	70.44	4.04	13.2	17.07	2.66	0.87	10.98	12.76	6.84
GoMo-A007	2006	3	70.4	68.05	4.83	14.7	15.64	2.28	0.75	10.52	14.35	7.15
GoMo-A008	2006	1	58.1	93.27	5.01	13.2	22.45	1.25	0.73	5.86	21.4	6.43
GoMo-A008	2006	2	64.1	90.18	7.58	13.5	17.15	1.54	0.82	8.59	18.02	8.31
GoMo-A008	2006	3	63.4	87.2	8.21	13.6	17.25	1.39	0.76	8.91	13.63	6.05
GoMo-A009	2006	1	67.3	74.57	2.3	13.9	17.74	1.63	0.81	3.64	16.18	6.3
GoMo-A009	2006	2	65.2	72.34	3.71	14.2	17.44	1.7	0.76	3.93	17.86	6.76
GoMo-A009	2006	3	67.4	69.03	6.64	14.6	15	1.88	0.83	6.29	12.2	6.54
GoMo-A010	2006	1	63	72.36	3.93	12.5	28.5	1.37	0.66	5.87	22.06	9.66
GoMo-A010	2006	2	76.3	69.65	7.04	14.1	24.06	1.36	0.69	8.21	15.52	7.13
GoMo-A010	2006	3	62.6	69.99	8.37	14.7	20.69	1.37	0.7	8.09	13.75	7.46
GoMo-A013	2006	1	57.2	94.11	6.91	10.9	26.39	1.12	0.56	4.33	23.36	6.67
GoMo-A013	2006	2	59.8	91.55	7.89	11.1	24.81	1.33	0.64	6.23	17.87	6.18
GoMo-A013	2006	3	64.9	88.78	8.11	11.8	22.25	1.9	0.99	9.21	20.96	6.18
GoMo-A014	2006	1	75.2	94.91	5.84	11.9	22.76	1.94	0.62	6.72	28	7.19
GoMo-A014	2006	2	83.1	91.91	7.43	13	15	2.22	0.86	8.45	22.85	6.19
GoMo-A014	2006	3	76.4	87.54	8.55	13.9	17.44	2.38	0.84	7.83	19.88	5.39
GoMo-A015	2006	1	52.6	88.57	2.94	16.5	24.06	2.19	0.87	5.62	12.13	6.53
GoMo-A015	2006	2	65.7	82	3.89	17.5	20.69	2.24	1.03	6.48	13.72	6.84
GoMo-A015	2006	3	60.5	82.62	3.18	18.5	21.17	2.96	1.19	8.79	11.33	5.98
GoMo-A016	2006	1	71.4	80.97	5.11	14.1	23.6	1.51	0.68	7	17.07	11.07
GoMo-A016	2006	2	74.8	81.13	5.35	13.1	19.79	1.6	0.68	7.46	15.46	11.29
GoMo-A016	2006	3	77.9	77.59	5.65	14.8	18.64	1.53	0.62	7.43	15.38	9.11
GoMo-A017	2006	1	73.5	78.1	4.44	11.7	20.9	1.19	0.42	4.44	21.46	6.24
GoMo-A017	2006	2	76.8	75.99	4.61	13.4	17.24	1.57	0.59	6.84	22.04	6.72
GoMo-A017	2006	3	77	72.03	7.94	12.8	22.76	1.4	0.43	6.09	19.29	5.76
GoMo-A018	2006	1	63.2	82.95	5.63	13.4	24.51	1.63	0.82	6.42	20.7	5.85
GoMo-A018	2006	2	66.6	77.8	7.33	13.9	23.71	1.54	0.77	6.44	22.54	6.03
GoMo-A018	2006	3	66.8	75.93	8.51	14.9	23.85	1.76	0.87	7.73	18.06	5.18
GoMo-A019	2006	1	63.8	87.19	3.22	12.9	16.74	1.71	0.92	4.99	13.01	6.51
GoMo-A019	2006	2	63.6	83.49	5.51	13.8	15.78	2.01	0.99	5.83	12.09	6.64
GoMo-A019	2006	3	67	84.13	6.52	14.9	16.46	1.83	0.9	6.01	13.36	6.09
GoMo-A020	2006	1	55.3	83.76	3.87	13.8	16.85	1.55	0.81	3.9	13.43	7.13
GoMo-A020	2006	2	66	83.34	4.13	17.4	21.42	1.41	0.66	4.77	15.23	6.4
GoMo-A020	2006	3	67.3	83.18	4.42	19	19.57	1.92	0.85	5.72	14.93	6.24
GoMo-A021	2006	1	61.28	79.57	3.71	13.5	19.63	1.73	0.75	6.91	18.81	7.12
GoMo-A021	2006	2	62.4	72.87	6.82	15.2	17.27	1.66	0.73	8.62	18.54	7.52
GoMo-A021	2006	3	56.7	72.67	7.45	14.2	20.83	1.6	0.71	6.51	19.94	7.12
GoMo-A022	2006	1	58.8	74.59	4.8	12.9	28.08	0.88	0.54	4.65	19.88	4.67
GoMo-A022	2006	2	58.8	72.82	6.61	13.3	25.83	0.91	0.49	4.55	20.75	4.09
GoMo-A022	2006	3	62	71.58	7.25	13.6	26.24	0.95	0.52	5.72	17.43	4.76
GoMo-A023	2006	1	43.1	79.26	3.22	16.4	19.22	1.77	0.65	5.81	14.04	7.42
GoMo-A023	2006	2	51.7	80.15	3.14	15.6	22.11	1.71	0.64	5.84	14.57	7.7
GoMo-A023	2006	3	49.9	74.97	3.76	17.8	21.47	1.69	0.61	6.79	10.4	6.43
GoMo-A024	2006	1	69.7	75.48	4.01	11.7	21.67	1.33	0.57	6.03	19.36	6.75
GoMo-A024	2006	2	70.2	73.46	4.38	14.1	19.67	1.49	0.63	6.58	15.85	6.41
GoMo-A024	2006	3	63.1	68.88	6.58	15.3	20.29	1.64	0.71	8.63	16.48	6.41
GoMo-A025	2006	1	58.1	71.75	3.04	15.7	19.9	1.32	0.56	5.66	16.5	8.46
GoMo-A025	2006	2	62	69.94	2.77	16.5	20.82	1.31	0.64	5.2	13.87	7.65
GoMo-A025	2006	3	71.8	67.26	3.09	16.9	20.74	1.39	0.63	7.08	13.82	7.18
GoMo-A026	2006	1	53.1	78.6	7.73	12.2	18.65	1.12	0.47	6.69	19.22	5.92
GoMo-A026	2006	2	52.8	71.77	8.37	13.9	16.4	1.24	0.48	8.05	15.85	7.43
GoMo-A026	2006	3	60	70.5	8.58	14.8	14.75	1.28	0.49	9.42	14.41	7.03
GoMo-A027	2006	1	62.3	67.42	3.22	14.8	20.47	1.61	1.24	5.8	17.67	6.22
GoMo-A027	2006	2	64.5	67.12	3.69	14.8	18.32	1.61	1.22	5.75	19.53	6.41
GoMo-A027	2006	3	63.2	66.9	5.12	14.6	19.04	1.59	1.18	5.77	18.69	6.44
GoMo-A028	2006	1	71.1	89.23	7.58	13.9	22.84	1.23	0.49	5.13	23.33	5.86
GoMo-A028	2006	2	72	84.95	8.1	13.7	21.89	1.27	0.54	5.83	22.84	6.11
GoMo-A028	2006	3	70.7	83.26	8.29	14.2	19.72	1.35	0.46	6.54	19.85	5.46
GoMo-A029	2006	1	57.9	67.55	3.5	17	18.63	2.01	1.32	7.44	13.15	8.76
GoMo-A029	2006	2	58.4	65.58	3.87	17.7	17.77	1.78	1.18	7.6	13.27	9.13
GoMo-A029	2006	3	57.9	64.95	4.16	19.7	19.39	1.87	1.31	8.56	18.78	10.29
GoMo-A030	2006	1	50.5	83.9	2.77	13.7	17.16	1.6	0.73	6.09	12.96	12.22
GoMo-A030	2006	2	50.2	78.66	3.4	11.2	18.82	1.17	0.64	5.16	11.47	11.7
GoMo-A030	2006	3	47.2	82.07	3.83	15	20	1.49	0.79	7.59	13.36	12.77
GoMo-A031	2006	1	56	77.42	4.06	13.5	19.4	1.56	0.54	5.06	15.26	9.62
GoMo-A031	2006	2	52.8	77.28	4.48	13.7	20.03	1.86	0.58	6.62	15.41	9.24
GoMo-A031	2006	3	51.2	77.35	5.55	14.3	17.66	2.1	0.61	6.72	14.08	8.77
GoMo-A032	2006	1	52.5	73.35	3.14	15.7	19.03	1.68	1.11	4.08	12.96	7.66
GoMo-A032	2006	2	68.7	70.9	3.14	15.5	17.59	1.64	1.02	4.82	10.56	6.53
GoMo-A032	2006	3	60.7	67.34	3.47	16.5	17.16	1.72	1.07	5.58	13.96	8.11
GoMo-A033	2006	1	62.4	82.69	3.5	11.2	23.56	2.02	1.17	5.04	18.56	6.69
GoMo-A033	2006	2	69	78.28	6.82	11.2	20.97	1.57	1.01	4.53	16.29	6.46
GoMo-A033	2006	3	72.3	74.09	8.26	12.1	19.85	1.26	0.72	5.12	14.82	6.19
GoMo-A034	2006	1	77.3	77.92	7.89	11.4	31.96	1.33	0.77	5.15	24.81	6.07
GoMo-A034	2006	2	73.3	76.28	8.67	13.8	32.04	1.3	0.88	5.04	26.88	7.16
GoMo-A034	2006	3	78	75.5	8.74	13.8	29.23	1.5	0.95	5.62	19.8	4.73
GoMo-A035	2006	1	57.1	78.05	6.74	12.6	28.31	1.31	0.71	4.62	24.32	5.81
GoMo-A035	2006	2	81.3	75.07	8.56	13.1	27.08	1.39	0.64	5.23	26.85	5.76
GoMo-A035	2006	3	89.9	76.48	8.51	13.2	26.03	1.37	0.64	6	24.16	5.55
GoMo-A037	2006	1	64.2	88.89	5.13	12.2	19.71	1.71	0.55	4.76	19.89	5.18
GoMo-A037	2006	2	71.8	84.99	7.03	12.4	17.55	2.12	0.71	6.08	16.61	5.58
GoMo-A037	2006	3	66.9	86.37	7.2	12.9	17.91	1.83	0.63	5.23	15.53	5.24
GoMo-A038	2006	1	62.4	95.6	4.41	15.5	23.82	1.14	0.78	5.22	18.54	12.2
GoMo-A038	2006	2	67	93.52	4.84	16.5	23.22	1.45	0.93	7.27	16.25	11.64
GoMo-A038	2006	3	67.8	85.38	6.23	16.4	22.93	1.66	1.03	8.64	14.07	11.1
GoMo-A039	2006	1	85.9	67.19	3.14	14.6	21.36	1.58	1.01	5.22	13.91	7.97
GoMo-A039	2006	2	78.8	64.69	4.01	15.9	19.3	1.76	1.2	6.44	13.72	9.03
GoMo-A039	2006	3	81.7	61.51	5.13	16.9	19.91	1.72	1.18	7.46	14.72	8.2
GoMo-A041	2006	1	57.9	74.3	2.2	14.3	25.24	1.17	0.5	3.5	24.82	4.86
GoMo-A041	2006	2	62.6	69.23	3.43	16	26.29	1.61	0.66	5.89	24.41	5.54
GoMo-A041	2006	3	71.6	69.32	6.82	15.8	22.24	1.47	0.6	7.51	23.61	6.23
GoMo-A042	2006	1	51.6	95.55	3.53	13	17.77	2.1	0.76	4.87	16.64	6.48
GoMo-A042	2006	2	50.9	90.26	6.99	14.5	14.78	2.4	0.78	6.81	11.51	6.36
GoMo-A042	2006	3	52.8	87.42	7.89	14.7	14.26	2.14	0.63	6.79	11.76	6.18
GoMo-A043	2006	1	52.6	69.25	2.71	11.5	18.17	1.52	0.59	5.72	15.59	5.55
GoMo-A043	2006	2	55.5	68.44	2.89	11.6	17.55	1.54	0.53	5.41	17.8	6.34
GoMo-A043	2006	3	55.9	66.19	4.08	12.5	17.69	1.74	0.71	5.68	17.12	5.95
GoMo-A044	2006	1	73.5	82.34	4.89	12.4	22.18	1	0.37	4.08	19.51	5.53
GoMo-A044	2006	2	75	78.96	7.13	13.1	21.69	1.2	0.47	6.25	18.71	5.57
GoMo-A044	2006	3	82.8	77.03	8.05	14.2	21.67	1.15	0.39	6.33	17.45	5.26
GoMo-A045	2006	1	55.2	78.69	6.94	13.2	20.01	1.39	0.62	5.58	16.79	5.94
GoMo-A045	2006	2	54.4	75.37	7.25	13.7	20.36	1.21	0.54	5.83	18.67	6.14
GoMo-A045	2006	3	53.7	72.48	7.67	14.7	18.89	1.8	0.9	5.51	12.67	5.31
GoMo-A046	2006	1	84.2	75.2	2.48	13.7	17.55	1.22	0.82	6.26	16.43	6.9
GoMo-A046	2006	2	81.1	70.99	4.86	16.3	14.69	1.61	0.82	8.12	17.35	6.97
GoMo-A046	2006	3	70.3	71.53	4.16	15.3	14.24	1.55	0.73	7.72	13.33	8.65
GoMo-A047	2006	1	55.5	81.36	2.89	14.9	24.83	1.17	0.68	3.99	18.91	6.19
GoMo-A047	2006	2	76.7	75.76	3.4	14.6	20.74	1.18	0.62	5.24	15.14	5.63
GoMo-A047	2006	3	70.3	69.94	3.64	15.8	16.85	1.64	0.7	8.62	12.08	5.01
GoMo-A048	2006	1	43.3	86.94	5.74	12.4	28.87	1.46	0.82	4.94	24.47	5.62
GoMo-A048	2006	2	50.6	84.38	7.41	13.4	26.26	1.38	0.8	6.42	24.6	6.09
GoMo-A048	2006	3	49.7	83.1	8.11	14	25.92	1.38	0.79	6.87	23.38	6.17
GoMo-A048	2006	1	51.6	80.14	7.28	12	23.22	1.32	0.75	5.29	22.7	5.64
GoMo-A048	2006	2	47.7	77.63	8.16	13.2	20.51	1.14	0.62	6.46	20.77	5.63
GoMo-A048	2006	3	47.8	73.96	8.9	14	17.31	1.25	0.52	6.97	15.38	5.29
GoMo-A049	2006	1	76.7	69.48	3.64	12.3	33.06	0.4	0.17	6.79	27.68	7.39
GoMo-A049	2006	2	67.5	65.02	6.12	13.9	37.48	0.49	0.22	6.88	23.71	6.39
GoMo-A049	2006	3	74.7	66.66	6.35	13.1	34.32	0.39	0.15	6.49	24.58	7.34
GoMo-A051	2006	1	59.5	86.31	7.06	11.6	14.24	1.49	0.5	5.88	10.93	5.36
GoMo-A051	2006	2	53.2	83.4	7.99	12.1	13.19	1.85	0.65	6.51	13	5.08
GoMo-A051	2006	3	59.8	80.9	8.02	12.3	12.86	1.69	0.57	6.23	13.02	5.09
GoMo-A052	2006	1	50.4	94.58	6.55	11.8	21.67	1.46	0.53	5.53	16.69	4.93
GoMo-A052	2006	2	54.5	93.05	6.39	12.5	19.34	1.69	0.6	6.23	14.9	5.34
GoMo-A052	2006	3	56.4	90.92	7.58	13	16.81	1.8	0.59	7.23	13.28	5.31
GoMo-A053	2006	1	71.7	79.14	6.37	13.7	20.95	1.87	0.62	6	23.01	4.46
GoMo-A053	2006	2	70.1	72.77	6.77	15	19.78	1.88	0.62	7.4	18.6	4.74
GoMo-A053	2006	3	59.5	68.58	8.19	16	19.46	1.88	0.62	7.27	18.2	5.3
GoMo-A054	2006	1	72.2	80.1	6.19	14.3	19.81	1.73	0.59	7.16	19.51	4.44
GoMo-A054	2006	2	79.7	77.19	6.97	15.2	19.76	1.78	0.57	7.79	19.15	5.01
GoMo-A054	2006	3	75.6	74.16	8.04	16.3	19.31	1.75	0.53	8.34	19.4	5.5
GoMo-A055	2006	1	70.7	85.18	4.2	13.1	21.6	1.6	0.88	6.12	19.36	7.34
GoMo-A055	2006	2	75.5	81.49	5.17	13.3	19.92	1.67	0.97	6.18	14.26	6.38
GoMo-A055	2006	3	69.5	83.91	7.64	12.7	18.77	1.67	0.91	7.64	15.33	6.44
GoMo-A056	2006	1	42.1	98.55	6.94	13.1	22.31	1.38	0.68	5.77	20.95	7.25
GoMo-A056	2006	2	38.7	96.38	7.44	13.7	22.36	1.3	0.66	6.91	15.98	5.28
GoMo-A056	2006	3	39.1	88.97	8.5	14.7	19.36	1.42	0.65	7.15	18.7	7.78
GoMo-A057	2006	1	61.4	79.3	3.58	16.3	23.34	2.23	1.18	6.85	17.16	10.24
GoMo-A057	2006	2	66.6	79.11	3.43	16.9	23.94	2.4	1.23	6.71	18.63	11.01
GoMo-A057	2006	3	70.9	79.1	4.17	16.7	22.64	2.19	1.19	7.61	16.09	10.24
GoMo-A058	2006	1	67.1	88	4.8	13	18.63	1.9	0.78	6.57	17.36	5.24
GoMo-A058	2006	2	72.4	87.89	5.73	14.3	19.27	1.9	0.85	7.08	14.06	4.18
GoMo-A058	2006	3	62.4	83.92	7.73	15.8	17.25	1.8	0.81	8.3	12.96	4.42
GoMo-A059	2006	1	47.5	77.21	4.06	15.9	34.49	1.53	0.68	7.19	23.34	12.16
GoMo-A059	2006	2	51	76.73	5.01	16.4	31.42	1.58	0.78	8.45	23.38	13.63
GoMo-A059	2006	3	56.3	77.35	5.79	16.6	30.61	1.6	0.74	8.59	22.12	12.03
GoMo-A059	2006	1	49	90.15	4.09	9.8	27.65	1.44	0.64	5.62	18.35	12.85
GoMo-A059	2006	2	59.3	87.36	5.7	14.8	28.05	1.49	0.66	7.56	20.75	13.12
GoMo-A059	2006	3	60.4	83.48	6.21	15.7	26.9	1.47	0.56	7.99	19.26	11.68
GoMo-A061	2006	1	45.4	76.35	8.25	10.5	26.47	1.54	0.55	5.13	28.41	4.94
GoMo-A061	2006	2	54.4	74.22	8.79	11.2	26.45	1.2	0.44	5.03	25.76	4.69
GoMo-A061	2006	3	67.5	73.4	9.04	11.5	25.24	1.18	0.44	5.32	25.79	4.69
GoMo-A062	2006	1	65	74.97	2.2	14	21.79	1.38	0.87	6.55	16.08	6.38
GoMo-A062	2006	2	81.1	73.53	2.48	14.8	21.36	1.87	1.08	6.72	15.35	6.16
GoMo-A062	2006	3	77	71.2	2.77	15.1	20.08	1.87	1.02	6.81	17.55	6.76
GoMo-A063	2006	1	89.9	80.34	2.71	11.6	23.26	1.79	0.73	4.27	18.74	7.51
GoMo-A063	2006	2	92.2	78.17	5.02	12.1	22.48	1.79	0.72	5.3	19.92	7.43
GoMo-A063	2006	3	95	78.59	6.05	11.9	23.38	1.55	0.65	5.5	16.86	5.96
GoMo-B001	2006	1	50.4	76.19	7.8	11.9	19.34	1.61	0.88	6.29	17.36	6.18
GoMo-B001	2006	2	56	84.09	7.77	11.6	19.96	1.51	0.88	5.29	17.35	7.46
GoMo-B001	2006	3	62.5	83.4	8.48	10.8	17.25	1.36	0.9	5.71	13.9	5.93
GoMo-B002	2006	1	62.1	79.73	6.83	14.1	24.2	1.31	0.71	7.21	26.45	4.65
GoMo-B002	2006	2	57.3	75.98	8.25	15.1	22.99	1.48	0.79	7.78	23.45	5.3
GoMo-B002	2006	3	56.2	74.18	8.89	14.9	17.9	1.39	0.73	7.78	20.1	5.24
GoMo-B005	2006	1	71.7	68.4	4.69	15.8	23.74	1.62	0.75	7.18	22.68	5.34
GoMo-B005	2006	2	71.8	66.88	7.2	17.4	23.99	1.51	0.74	8.63	24.52	5.93
GoMo-B005	2006	3	60.3	64.29	8.2	16.9	20.29	1.81	0.82	8.11	24.41	5.47
GoMo-B006	2006	1	67.6	81.13	4.74	12.6	24.24	1.46	0.59	5.75	25.22	5.95
GoMo-B006	2006	2	64.9	78.12	7.67	14	25.01	1.22	0.46	7.1	24.74	5.84
GoMo-B006	2006	3	65.6	74.43	8.17	14.8	23.1	1.29	0.41	7.34	23.38	5.8
GoMo-B007	2006	1	57.4	74.83	4.32	13.9	24.3	1.97	0.72	6.1	24.88	5.05
GoMo-B007	2006	2	63.9	71.8	3.04	15.5	27.19	1.87	0.66	5.93	26.09	5.86
GoMo-B007	2006	3	76.4	68.77	4.57	15.1	23.08	1.92	0.62	6.25	22.41	5.05
GoMo-B008	2006	1	59.7	86.24	7.85	12.7	19.28	1.94	0.58	5.82	17.31	5.8
GoMo-B008	2006	2	61.6	88.15	7.42	12.5	21.24	1.92	0.57	5.55	20.58	5.66
GoMo-B008	2006	3	56.4	85.65	8.5	12.9	20.92	1.91	0.59	6.26	19.2	5.92
GoMo-B009	2006	1	67.85	82.41	7.9	10.6	23.24	1.26	0.74	5.84	19.53	8
GoMo-B009	2006	2	67.35	75.14	8.39	12.7	20.76	1.4	0.8	6.87	18.38	7.44
GoMo-B009	2006	3	70.35	75.53	8.62	13.3	17.97	1.39	0.74	7.29	13.8	6.02
GoMo-B009	2006	1	61.28	85.72	7.9	11.1	20.71	1.35	0.71	5.43	19.09	7.94
GoMo-B009	2006	2	69.05	85.33	8.29	10.4	19.79	1.32	0.75	5.86	13.68	6.24
GoMo-B009	2006	3	74.55	77.85	8.66	12.3	17.99	1.29	0.75	6.42	13.36	6.23
GoMo-B010	2006	1	81.4	78.96	6.16	12.2	27.47	1.22	0.6	4.91	25.14	7.41
GoMo-B010	2006	2	92.8	77.77	7.66	13.7	24.13	1.17	0.62	6.74	21.54	8.65
GoMo-B010	2006	3	82.9	75.32	8.27	15	23.44	1.27	0.62	7.62	19.63	6.85
GoMo-B011	2006	1	66.9	80.44	4.36	12.6	26.81	1.79	0.62	5.9	20.81	10.68
GoMo-B011	2006	2	77.8	77.25	6.26	14	25.45	1.83	0.62	6.64	19.82	9.47
GoMo-B011	2006	3	81.8	73.51	7.78	13.1	23.31	1.82	0.66	6.77	15.06	6.75
GoMo-B014	2006	1	92.8	91.91	4.37	10.8	26.18	1.82	0.97	5.4	22.46	8.34
GoMo-B014	2006	2	77.1	86.11	7.83	12.9	22.81	1.49	1.09	6.64	18.58	6.51
GoMo-B014	2006	3	93.1	88.87	7.63	12.5	23.14	1.68	0.85	5.8	19.69	7.76
GoMo-B016	2006	1	70	91.63	4.44	10.5	30.25	1.76	1	3.82	28.8	5.56
GoMo-B016	2006	2	67.2	81.59	8.19	12.1	29.85	1.78	1.14	5.07	28.72	5.31
GoMo-B016	2006	3	68.3	80.89	8.62	12.7	27.4	1.82	1.13	5.29	27.93	4.98
GoMo-B018	2006	1	55.8	70.39	3.43	16.6	20.76	2.57	1.37	7.01	16.5	11.67
GoMo-B018	2006	2	56.3	66.44	4.04	17	17.75	3.1	1.74	8.11	15.81	11.25
GoMo-B018	2006	3	54.4	66.71	4.08	16.9	18.38	2.81	1.6	9.22	16.63	10.88
GoMo-B020	2006	1	60.7	66.58	5.56	14.4	14.68	2.1	1.21	5.96	15.44	6.49
GoMo-B020	2006	2	77.4	66.5	6.39	14.7	12.88	2.03	1.09	6.85	13.9	5.9
GoMo-B020	2006	3	67.7	64.99	7.62	15.4	11.27	2.05	1.18	7.64	12.65	6.19
GoMo-B021	2006	1	79.5	73.3	3.18	17.3	17.85	2.35	1.45	7.41	18.13	7.76
GoMo-B021	2006	2	71.4	66.47	3.33	18.2	14.69	2.5	1.54	7.73	16.24	7.9
GoMo-B021	2006	3	80.4	72.22	4.99	15.5	18.82	2.13	1.34	7.71	19.18	7.68
GoMo-B022	2006	1	76.4	78.09	3.87	13.3	26.29	1.36	0.47	6.19	22.89	8.07
GoMo-B022	2006	2	60.3	79.45	6.94	15.2	24.99	1.43	0.87	6.81	14.11	9.88
GoMo-B022	2006	3	62.4	79.2	6.91	13.8	27.55	1.28	0.72	5.03	20.9	8.28
GoMo-B024	2006	1	66.7	73.41	3.71	14.9	24.57	1.68	0.76	5.67	20.08	11.34
GoMo-B024	2006	2	68.8	70.94	4.16	15.2	23.14	1.51	0.73	6.87	18.62	11.37
GoMo-B024	2006	3	69.7	67.77	4.5	16.7	20.32	1.49	0.72	7.72	18.63	10.05
GoMo-B025	2006	1	69.6	70.93	2.64	11.4	20.99	1	0.39	3.29	22.58	6.12
GoMo-B025	2006	2	73	71.04	3.93	12.8	18.12	1.37	0.52	4.78	19.63	6.55
GoMo-B025	2006	3	67.4	68.09	4.86	12.2	16.85	1.66	0.8	5.64	18.26	6.69
GoMo-B027	2006	1	67	81.16	5.11	12.1	25.3	1.3	0.55	4.74	24.95	8.64
GoMo-B027	2006	2	74.6	79.56	7.62	13	24.8	1.21	0.55	5.82	23.81	8.92
GoMo-B027	2006	3	75.2	74.64	8.84	12.8	21.9	1.22	0.5	7.21	20.58	8.04
GoMo-B028	2006	1	86.8	77.6	7.4	11.6	36.45	1.56	0.84	4.43	35.62	5.62
GoMo-B028	2006	2	76.2	79.43	8.11	11.6	36.89	1.36	0.78	4.39	34.2	5.23
GoMo-B028	2006	3	76.8	77.39	8.63	12.2	34.1	1.51	0.82	5.03	34.77	4.72
GoMo-B028	2006	1	76.7	77.06	8.22	12.1	34.24	1.55	0.88	4.95	34.15	4.98
GoMo-B028	2006	2	82	78.64	8.76	12.1	32.73	1.57	0.8	5.02	31.47	4.76
GoMo-B028	2006	3	84.3	76.55	9.12	12.8	31.69	1.69	0.82	4.96	36.64	4.33
GoMo-B029	2006	1	50.5	70.75	2.64	15.4	20.23	1.78	0.81	5.3	17.89	10.02
GoMo-B029	2006	2	49.8	67.43	3.3	13.9	20	1.86	0.88	6.04	18.02	9.34
GoMo-B029	2006	3	52.2	64.52	3.78	15.8	17.27	1.92	0.88	6.86	15.66	8.8
GoMo-B030	2006	1	41.6	73.65	3.71	15.3	37.48	1.46	0.86	6.29	34.35	7.96
GoMo-B030	2006	2	38.5	71.01	6.48	15.7	35.72	1.58	0.91	7.56	30.52	9.15
GoMo-B030	2006	3	36.9	70.42	7.77	15.9	35.25	1.6	1.02	7.85	30.67	8.41
GoMo-B034	2006	1	56.5	86.91	4.29	13.1	19.63	2.74	0.62	5.12	20.69	5.01
GoMo-B034	2006	2	61	82.87	7.39	14.6	17.8	2.23	0.56	5.15	18.15	5.78
GoMo-B034	2006	3	58.7	81.31	7.71	14.5	14.71	2.84	0.6	6.39	15.56	5.95
GoMo-B038	2006	1	47.2	85.91	4.85	13	22.57	1.97	0.85	6.45	19.34	10.13
GoMo-B038	2006	2	47	85.36	5.7	16.1	23.97	1.84	0.78	7	19.08	7.81
GoMo-B038	2006	3	44	79.9	7.41	12.8	21.07	1.91	0.81	7.73	19.91	8.19
GoMo-B039	2006	1	53.1	81.17	6.92	14.9	22.06	1.69	0.62	6.75	20.48	8
GoMo-B039	2006	2	60.1	76.79	7.37	16.3	20	1.82	0.67	7.96	19.2	7.74
GoMo-B039	2006	3	61.1	79.54	6.73	14.6	20.83	1.54	0.56	7.28	19.67	7.04
GoMo-B041	2006	1	68.7	78.58	2.77	14.6	14.07	1.94	0.52	6.82	15.36	6.46
GoMo-B041	2006	2	78	78	2.77	14.1	14.53	1.66	0.51	6.83	16.19	6.42
GoMo-B041	2006	3	74.6	77.61	4.06	14.5	13.82	1.89	0.55	7.59	14.59	6.23
GoMo-B042	2006	1	50.2	85.29	4.44	13.1	19.09	1.81	1.04	6.1	17.19	7.78
GoMo-B042	2006	2	53.3	80.13	4.64	14.6	17.29	1.83	1.09	7.29	14.59	7.41
GoMo-B042	2006	3	53.7	76.96	5.4	14.5	16.81	1.59	0.97	6.62	13.31	7.39
GoMo-B043	2006	1	54.7	77.13	3.47	13	26.76	1.36	0.87	4.74	24.81	9.54
GoMo-B043	2006	2	46.2	72.75	7.65	17	21.75	1.98	1.16	7.42	20.71	8.86
GoMo-B043	2006	3	55.2	70.48	8.35	17.1	20.94	1.81	1.06	7.77	19.67	7.75
GoMo-B044	2006	1	81.7	76.72	4.52	14.5	25.03	1.45	0.66	5.31	23.59	7.9
GoMo-B044	2006	2	79.2	74.84	4.88	13.1	21.4	1.57	0.66	6.18	21.1	7.3
GoMo-B044	2006	3	70.8	72.66	6.09	12.7	22.41	1.44	0.59	6.04	22.02	7.59
GoMo-B045	2006	1	57.6	91.79	3.09	16	21.83	2.19	0.72	6.33	24.25	7.72
GoMo-B045	2006	2	63.9	86.4	4.45	16.1	22.76	1.98	0.77	6.97	23.54	8.28
GoMo-B045	2006	3	69.9	90.32	6.14	16.8	18.7	1.98	0.73	9.01	19.36	7.51
GoMo-C001	2006	1	44.9	78.69	7.14	16.3	30.92	1.31	0.87	6.21	24.07	8.02
GoMo-C001	2006	2	31.5	72.08	7.89	13.6	30.08	1.7	0.91	6.28	18.2	7.07
GoMo-C001	2006	3	39.1	70.14	8.67	18.9	25.42	1.6	0.96	8.72	23.75	7.96
GoMo-C002	2006	1	51.5	69.39	3.14	13.9	18.76	2.05	1.21	5.65	15.46	6
GoMo-C002	2006	2	49	68.73	2.71	14.5	20.32	1.87	1.19	4.66	14.66	5.51
GoMo-C002	2006	3	55.6	67.32	4.25	15.4	19.37	2.01	1.18	4.08	11.76	5.31
GoMo-C003	2006	1	63.4	82.83	6.83	15.8	28.08	1.61	0.95	6.97	28.44	7.3
GoMo-C003	2006	2	60	78.31	7.78	17.4	27.84	2.12	1.26	8.5	29.82	7.85
GoMo-C003	2006	3	55	77.98	8.34	18.2	27.78	1.95	1.2	10.02	29.91	7.87
GoMo-C006	2006	1	58.3	70.46	3.81	15.1	24.65	1.74	0.86	5.55	23.92	7.03
GoMo-C006	2006	2	62.1	68.97	4.54	14.7	24.24	1.73	0.84	5.68	23.18	6.5
GoMo-C006	2006	3	73.8	69.35	7.64	17.6	25.12	1.95	0.91	7.78	19.74	7.07
GoMo-C007	2006	1	71.1	72.31	3.18	11.2	26.94	1.48	0.62	5.05	24.32	7.65
GoMo-C007	2006	2	67.8	69.04	4.41	12.1	29.09	1.79	0.76	6.1	27.27	8.78
GoMo-C007	2006	3	82.5	69.35	4.89	13.1	27.2	1.78	0.74	6.79	26.5	7.65
GoMo-C009	2006	1	81.8	86.37	3.87	12.2	23.41	1.87	0.52	6.36	25.62	5.67
GoMo-C009	2006	2	71.2	85.2	5.32	13.3	22.16	1.62	0.5	6.22	21.87	4.77
GoMo-C009	2006	3	80.5	81.83	7.19	13.2	19.52	1.66	0.49	6.95	19.19	5.24
GoMo-C010	2006	1	51.9	91.52	6.08	17.3	22	2.33	0.97	5.8	20.79	9.19
GoMo-C010	2006	2	56.5	87.06	7.05	17.2	20.67	2.08	1	7.11	18.65	8.76
GoMo-C010	2006	3	56.9	86.81	8.26	18.8	19.21	2.1	1	8.12	18.75	8.96
GoMo-C011	2006	1	36.6	81.25	7.73	14.1	24.65	1.62	0.68	5.79	26.92	5.49
GoMo-C011	2006	2	39.7	74.19	8.69	13.9	21.06	1.67	0.64	6.69	22.45	5.88
GoMo-C011	2006	3	38.4	71.74	9.08	14.5	19.91	1.69	0.7	7.31	21.48	6.07
GoMo-C012	2006	1	43	69.68	3.33	11.2	20.7	1.83	0.98	4.4	18.9	7.86
GoMo-C012	2006	2	44.2	69.17	4.45	12.8	17.68	2.18	1.11	5.46	15.49	8.28
GoMo-C012	2006	3	40.8	67.66	4.98	13.9	18.5	2.23	1.22	5.82	15.61	8.48
GoMo-C014	2006	1	71	73.35	4.56	13.6	18.83	1.77	0.81	4.99	16.88	8.5
GoMo-C014	2006	2	63.7	70.55	4.51	13.8	18.63	2.12	0.97	6.39	18.05	7.73
GoMo-C014	2006	3	67.5	69.64	6.87	16.9	16.58	2.29	1.07	8.6	14.3	8.61
GoMo-C016	2006	1	48.3	76.59	8.15	12.8	27.19	1.63	0.87	5.03	25.37	8.57
GoMo-C016	2006	2	42	81.24	8.06	11.9	23.16	1.25	0.5	5.83	24.3	5.65
GoMo-C016	2006	3	48.9	77.77	8.43	12.3	22.12	1.19	0.45	5.47	21.72	5.63
GoMo-C017	2006	1	66.8	72.45	3.56	13.3	24.49	1.24	0.64	6.45	21.99	8.58
GoMo-C017	2006	2	86.1	70.98	5.02	11.9	27.39	1.24	0.67	5.23	23.25	9.18
GoMo-C017	2006	3	76.6	68.57	7.19	12.8	22.44	1.25	0.61	7.13	21.47	8.5
GoMo-C018	2006	1	76.2	95.5	3.37	10.7	31.02	1.53	0.54	4.37	21.66	11.82
GoMo-C018	2006	2	89.4	89.52	4.85	11.3	25.5	1.67	0.57	4.79	19.04	10.74
GoMo-C018	2006	3	89.2	84.8	7.54	10.9	21.7	1.86	0.66	6.27	17.65	8.87
GoMo-C020	2006	1	55	72.67	3.76	13.1	16.98	1.46	0.54	5.75	15.85	8.45
GoMo-C020	2006	2	56.2	68.77	7.13	14.2	15.8	1.67	0.57	7.47	13.06	8.61
GoMo-C020	2006	3	48.3	67.79	7.67	14.9	13.8	1.61	0.57	7.3	11.47	7.7
GoMo-C023	2006	1	40.9	92.8	8.6	9.6	35.41	1.06	0.58	3.71	23.43	6.28
GoMo-C023	2006	2	47.2	84.2	9.2	13.1	38.09	1.24	0.73	5.36	36.88	6.97
GoMo-C023	2006	3	47.8	80.43	9.13	14.1	32.21	1.31	0.67	6.49	30.3	6.2
GoMo-C024	2006	1	46.8	77.9	3.14	13.9	24.78	1.32	0.59	6	21.1	10.81
GoMo-C024	2006	2	49.6	71.59	4.25	13.5	22.5	1.38	0.64	8.08	18.13	10.27
GoMo-C024	2006	3	47.1	68.62	5.45	15.8	22.89	1.38	0.73	9.03	20.94	9.55
GoMo-C025	2006	1	48.1	86.55	3.66	14.8	20.64	2.05	1.09	6.61	14.5	9.13
GoMo-C025	2006	2	55.6	81.07	4.48	15.2	20.59	1.97	1.18	7.54	17.57	11.19
GoMo-C025	2006	3	50.3	79.57	5.94	16	20.3	1.98	1.13	7.93	17.81	10.15
GoMo-C026	2006	1	54.3	71.86	7.03	12.6	25.65	1.41	0.51	7.86	24.34	8.5
GoMo-C026	2006	2	55.5	71.24	7.91	14.1	26.19	1.4	0.93	6.66	22.69	7.8
GoMo-C026	2006	3	68.1	68.57	8.48	14.4	24.24	1.29	0.45	8.18	22.36	7.59
GoMo-C027	2006	1	78.3	81.36	4.14	12.3	20.73	1.59	0.45	5.09	19.54	6.44
GoMo-C027	2006	2	73.2	80.25	4.58	11.2	19.49	1.84	0.52	5.98	21.5	7.04
GoMo-C027	2006	3	69.4	79.26	5.96	13	18.76	1.8	0.49	6.58	19.51	6.77
GoMo-C030	2006	1	61.1	66.55	3	17.5	21.69	1.76	0.77	5.87	20.71	7.97
GoMo-C030	2006	2	60.6	70.2	4.8	18	22.92	1.39	0.72	5.6	23.82	8.57
GoMo-C030	2006	3	52.2	68.2	6.51	18.4	24.84	1.16	0.64	5.9	24.04	8.24
GoMo-C031	2006	1	65	85.61	7.33	12.3	21.53	1.37	0.65	5.42	19.86	6.52
GoMo-C031	2006	2	63.3	81.05	7.61	12.5	15.47	1.47	0.67	6.68	14.96	5.95
GoMo-C031	2006	3	61.8	80.59	8.33	13.4	16.25	1.68	0.67	6.72	15.15	6.5
GoMo-C035	2006	1	61.9	89.2	3.14	12.3	19.96	1.81	0.77	6.01	16.38	8.86
GoMo-C035	2006	2	58.2	84.34	3.56	14	14.49	2.16	0.92	7.12	13.33	8.59
GoMo-C035	2006	3	63.2	81.96	3.91	13.7	13.59	2.24	0.97	8.26	13.67	7.42
GoMo-C036	2006	1	76.6	84.84	3.18	11.7	20.03	1.52	0.85	5.6	17.48	8.65
GoMo-C036	2006	2	84	82.07	6.1	11.1	22.03	1.29	0.69	5.92	19.16	7.38
GoMo-C036	2006	3	89	80.02	7.28	12.3	19.34	1.36	0.82	6.81	17.26	7.52
GoMo-C037	2006	1	53.4	76.86	3.43	12.7	21.83	1.44	0.8	5.44	22.7	6.87
GoMo-C037	2006	2	56.6	76.52	5.09	13.9	22.67	1.62	0.83	5.3	18.01	6.05
GoMo-C037	2006	3	62.3	79.62	6.46	14.5	21.59	1.36	0.74	6.48	18.81	7.04
GoMo-C041	2006	1	65.9	81.96	6.94	12.1	26.71	1.64	0.59	5.41	24.57	6.63
GoMo-C041	2006	2	71.7	78.69	8.05	13.1	28.89	1.39	0.6	5.7	24.81	7.15
GoMo-C041	2006	3	62.5	79.68	8.43	14.5	23.31	1.85	0.68	7.33	21.98	7.15
GoMo-C042	2006	1	66.1	91.92	3.26	12.9	15.1	1.39	0.79	5.8	13.34	8.67
GoMo-C042	2006	2	69.4	89.91	5.58	13.2	14.54	1.36	0.7	6.23	13.98	7.84
GoMo-C042	2006	3	68.2	86.34	7.95	13.8	14.24	1.36	0.76	7.36	13.4	6.98
GoMo-C048	2006	1	52.8	75.76	4.03	12.5	28.34	1.39	0.8	6.62	20.85	13.97
GoMo-C048	2006	2	54.7	73.8	5.3	14.2	28.4	1.36	0.81	7.13	19.49	13.6
GoMo-C048	2006	3	54.5	72.06	6.08	14.7	26.28	1.36	0.84	8.21	19.45	13.57
GoMo-C049	2006	1	60	81.06	4.8	10.8	26.03	1.62	0.71	4.43	24.86	5.5
GoMo-C049	2006	2	60.1	76.33	7.6	11.9	22.11	1.81	0.67	5.14	28.21	6
GoMo-C049	2006	3	60.9	75.98	7.94	11.8	22.67	1.58	0.64	5.44	20.07	5.31
GoMo-C050	2006	1	55.1	76.92	8.54	12.2	24.89	1.91	0.83	4.81	17.07	5.78
GoMo-C050	2006	2	59.8	79.76	8.46	11.7	24.83	1.72	0.64	4.65	20.4	5.54
GoMo-C050	2006	3	56.7	70.42	9.25	12.7	21.41	1.9	0.86	8.39	19.45	5.75
GoMo-C052	2006	1	53.6	76.96	2.2	11.2	33.57	0.96	0.27	5.17	27.57	6.73
GoMo-C052	2006	2	48.6	71.39	2.2	12.6	28.99	1.09	0.35	5.86	29.23	6.53
GoMo-C052	2006	3	54.1	70.83	4.11	13.8	26.6	1.11	0.3	7.04	25.63	7.08
GoMo-C053	2006	1	63.8	86.48	3.66	12.1	25.97	1.86	0.97	5.38	23.27	8.3
GoMo-C053	2006	2	55.8	86.99	3.71	12.8	24.22	1.97	1.06	5.42	22.43	8.51
GoMo-C053	2006	3	65.1	80.25	5	14.1	23.71	1.91	0.98	6.6	21.1	8.18
GoMo-C056	2006	1	70.4	79.26	3.76	13.9	19.09	1.72	0.8	6.25	18.33	6.22
GoMo-C056	2006	2	52.3	76.19	5.74	14.2	18.17	1.61	0.7	6.87	15.96	7.16
GoMo-C056	2006	3	53.3	78.49	7	15.9	19.46	1.57	0.71	7.41	17.59	6.24
GoMo-C060	2006	1	69.3	70.93	6.33	13.8	29.84	1.42	0.5	5.36	28.35	6.19
GoMo-C060	2006	2	69.4	73.55	6.74	15	29.09	1.71	0.72	5.94	30.58	4.98
GoMo-C060	2006	3	68.7	72.11	7.1	15.1	28.44	1.89	0.62	6.43	25.79	5.01
GoMo-C061	2006	1	46.7	73.65	4.8	14.3	25.33	1.3	0.7	5.29	22.54	5.21
GoMo-C061	2006	2	36.5	74.04	7.49	17.4	23.76	1.58	0.88	8.12	22.19	6.94
GoMo-C061	2006	3	56.3	74.83	8.48	16.5	22.48	1.16	0.82	7.88	18.71	5.31
GoMo-C062	2006	1	47.5	81.13	3.64	13.9	24.51	1.36	0.59	5.84	20.51	7.09
GoMo-C062	2006	2	48.8	79.62	5.72	16.3	21.33	1.53	0.74	6.78	18.71	7.69
GoMo-C062	2006	3	65.9	75.91	4.86	15.9	17.92	1.65	0.71	8.49	13.81	7.92
GoMo-C063	2006	1	63.5	72.75	2.48	15	23.47	1.59	0.6	6.1	25.63	6.87
GoMo-C063	2006	2	54.4	77.35	3.74	14.9	26.33	1.47	0.71	5.91	23.3	7.97
GoMo-C063	2006	3	55	73.35	3.18	15.7	21.24	1.8	0.73	6.75	21.07	8.18
GoMo-C064	2006	1	68.9	75.69	5.01	12.1	25.27	1.45	0.66	4.76	20.71	6.17
GoMo-C064	2006	2	85.5	79.26	4.63	14.1	27.52	1.24	0.57	5.7	26.35	5.33
GoMo-C064	2006	3	94.4	77.84	8.32	14.5	25.53	1.38	0.59	6.73	22.15	5.95
GoMo-C067	2006	1	36.6	79.95	6.76	17.4	32.03	1.73	0.97	6.9	23.05	9
GoMo-C067	2006	2	38.9	84.99	8.25	17	30.75	1.6	1.01	5.67	19.45	8.86
GoMo-C067	2006	3	33.1	84.96	7.86	18.1	32.69	1.42	0.98	6.79	23.13	8.03
GoMo-C069	2006	1	65.9	71.39	4.08	14.5	25.92	1.44	0.62	6.51	21.36	6.46
GoMo-C069	2006	2	57.5	72.12	6.78	15.8	22.11	1.53	0.66	7.4	21.79	7.78
GoMo-C069	2006	3	63	69.04	5.41	15.8	18.99	1.64	0.53	8	17.46	7.34
GoMo-C071	2006	1	55.2	73.71	2.56	13.7	26.75	1.42	0.91	6.44	22.41	11.14
GoMo-C071	2006	2	54.1	71.86	2.94	14.2	23.63	1.65	1.1	6.83	19.98	10.74
GoMo-C071	2006	3	49.5	70.68	3.37	15.2	26.44	1.61	0.99	7.13	21.63	12.06
GoMo-C072	2006	1	50.3	75.86	4.03	14.2	21.71	1.46	0.88	5.45	13.63	6.73
GoMo-C072	2006	2	45.9	74.47	5.82	13	18.96	1.32	0.74	3.93	12	5.85
GoMo-C072	2006	3	43.8	79.56	7.55	14.9	25.38	1.3	0.93	5.62	17.37	7.15
GoMo-C073	2006	1	63.5	87.28	7.14	13.5	22.52	1.53	0.95	6.46	16.56	8.96
GoMo-C073	2006	2	68.7	85.43	7.27	13.2	21.54	1.51	0.87	6.46	15.19	9.11
GoMo-C073	2006	3	51.8	86.83	8.24	13.3	21.69	1.36	1.18	11.83	13.97	6.5
GoMo-C074	2006	1	86.8	77.44	3.26	13.4	26.78	1.23	0.72	5.57	23.34	8.18
GoMo-C074	2006	2	59.5	76.52	6.48	13.5	25.88	1.06	0.99	5.48	24.25	7.82
GoMo-C074	2006	3	92.2	78	8.1	15.9	25.86	0.95	0.75	7.27	23.05	6.59
GoMo-C075	2006	1	44.4	76.06	6.62	13.9	27.18	1.69	0.72	6.73	28.33	7.2
GoMo-C075	2006	2	47.3	76.7	7.13	13.7	26.73	1.55	0.76	7.05	27.32	7.04
GoMo-C075	2006	3	47.4	74.23	8.83	16.5	25.74	1.67	0.72	8.53	26.2	7.15
GoMo-C077	2006	1	62.6	94.16	2.3	15.8	26.38	1.91	1.64	5.49	18.68	5.71
GoMo-C077	2006	2	66.3	82.9	1.95	17.1	24.79	2.4	0.52	6.44	24.11	6.79
GoMo-C077	2006	3	54.4	85.38	5.55	15.5	22.52	2.49	1.21	7.88	16.89	8.96
GoMo-C078	2006	1	49.8	85.34	1.95	14.7	31.73	1.49	0.95	6.62	24.28	11.3
GoMo-C078	2006	2	54.1	82	2.64	15.9	28.75	1.65	0.66	7.85	23.05	10.86
GoMo-C078	2006	3	51.3	82.72	5.98	16.3	30.81	1.19	0.75	4.85	18.27	7.91
GoMo-C080	2006	1	58.7	84.73	4.87	16.4	13.92	1.92	0.84	6.91	14.64	7.63
GoMo-C080	2006	2	68.9	83.84	7.24	17.7	14.69	1.94	0.89	7.93	13.36	6.53
GoMo-C080	2006	3	52.8	84.52	7.13	18.4	15.78	1.9	0.83	7.69	14.94	7.28
GoMo-C081	2006	1	49	82.33	5.98	13.6	28.37	1.29	0.63	6.04	29.4	5.21
GoMo-C081	2006	2	50.4	79.67	6.41	13.5	28.46	1.38	0.71	6.22	30.14	4.99
GoMo-C081	2006	3	47.3	77.35	7.96	13	28.78	1.36	0.73	6.85	30.55	5.49
GoMo-C083	2006	1	37.9	83.84	2.4	16.6	17.74	1.86	0.79	3.99	11.39	7.57
GoMo-C083	2006	2	42.1	81.22	2.56	17.5	16.9	1.16	1.61	4.73	13.9	8.55
GoMo-C083	2006	3	52.9	89.27	2.56	18.1	15.91	1.16	1.75	4.68	16.07	9.15
GoMo-C085	2006	1	50.3	85.75	8.62	12	24.6	1.45	0.39	6.04	24.96	5
GoMo-C085	2006	2	46.2	82.68	9.03	13.4	21.16	1.68	0.46	6.05	23.99	5.22
GoMo-C085	2006	3	47.7	79.54	9.6	12.6	22.17	1.76	0.39	6.59	22.89	5.25
GoMo-C086	2006	1	64.7	83.32	3.76	12.4	32.03	1.45	0.66	6.31	29.19	8.22
GoMo-C086	2006	2	70.3	81.8	5.46	13.7	30.28	1.36	0.66	7.39	27.36	9
GoMo-C086	2006	3	65.9	77.04	7.79	13.5	32.51	1.36	0.68	8.15	29.07	9.83
GoMo-C086	2006	1	64.8	83.9	5.54	12.3	30.63	1.33	0.61	6.35	28.74	7.8
GoMo-C086	2006	2	65.7	80.71	5.55	13.3	29.46	1.28	0.54	6.49	25.81	7.04
GoMo-C086	2006	3	68.9	79.2	6.62	13.6	28.98	1.39	0.61	7.46	25.65	6.87
GoMo-C087	2006	1	64.2	73	6.11	14.7	23.47	1.87	0.75	6.54	26.51	5.36
GoMo-C087	2006	2	54.2	72.8	6.25	13.5	24.13	1.7	0.59	5.91	25.63	4.72
GoMo-C087	2006	3	52.5	69.68	7.75	15.6	23.19	1.73	0.59	6.67	24.39	5.01
GoMo-C089	2006	1	70.4	74.91	4.83	12.5	31.22	1.49	0.71	5.39	29.33	7
GoMo-C089	2006	2	80.6	73.81	5.25	12.2	27.73	1.46	0.72	5.73	26.56	6.49
GoMo-C089	2006	3	81.1	72.38	6.54	15.2	28.54	1.42	0.66	6.67	28.24	6.74
GoMo-C090	2006	1	37.8	82.48	3.43	17.8	22.15	1.99	0.98	8.02	18.2	8.98
GoMo-C090	2006	2	47.9	78	4.74	18.5	24.13	1.94	0.87	9.07	18.13	7.92
GoMo-C090	2006	3	43.7	74.47	5.67	20.6	26.07	2.05	0.99	9.86	24.99	9.13
GoMo-C093	2006	1	50.8	81.75	7.47	16.6	26.71	1.53	0.85	7.69	20.31	8.11
GoMo-C093	2006	2	50.3	79.94	8.05	14.3	26.29	1.47	0.73	7.11	23.24	8.18
GoMo-C093	2006	3	48.3	78.83	8.61	18.5	28.1	1.42	0.82	8.41	23.63	9.21
GoMo-C098	2006	1	46.8	76.59	3.97	13.2	25.33	1.62	0.93	4.66	21.48	7.04
GoMo-C098	2006	2	47.1	72.21	7.12	12.9	23.02	1.57	0.94	5.05	20.3	6.46
GoMo-C098	2006	3	43.7	70.8	7.68	14.3	23.24	1.62	1	6.07	23.23	8.25
GoMo-C099	2006	1	53.9	84.31	2.56	13.8	25.88	1.82	0.88	4.29	21.79	8.21
GoMo-C099	2006	2	59.3	84.5	2.56	14	24.23	1.58	0.71	4.76	20.37	7.55
GoMo-C099	2006	3	60.9	80.72	3.18	14.2	23.89	1.75	0.79	6.09	19.73	8.54
GoMo-C100	2006	1	47.8	85.44	3.09	13.2	22.73	1.41	0.72	5.16	19.13	7.37
GoMo-C100	2006	2	47.5	83.52	6.38	11.6	21.79	1.34	0.72	5.27	17.01	6.8
GoMo-C100	2006	3	54.3	81.53	7	12.7	20.73	1.37	0.72	6.62	15.87	8.03
GoMo-C101	2006	1	55.6	95.11	2.89	13.9	21.5	1.61	0.82	5.58	18.05	6.9
GoMo-C101	2006	2	55.6	89.04	3.3	15.5	16.95	1.54	0.76	7.12	15.31	6.73
GoMo-C101	2006	3	47.6	77.77	3.61	15.4	17.29	2.04	0.86	5.66	14.28	7.46
GoMo-C102	2006	1	60.9	77.11	3.78	11.5	29.2	1.28	0.52	5.31	27.23	6.78
GoMo-C102	2006	2	64.1	71.39	7.06	14.5	26.77	1.41	0.54	6.47	24.07	6.78
GoMo-C102	2006	3	63	72.07	7.48	15.5	26.64	1.45	0.55	7.11	25.56	7.33
GoMo-C103	2006	1	64.2	86.99	5.78	13.2	28.54	1.73	0.87	4.39	22.55	7.23
GoMo-C103	2006	2	51.1	77.9	7.2	13.5	29.44	1.98	1.02	5.13	24.84	9.16
GoMo-C103	2006	3	57.9	83.92	7.2	12.7	23.24	1.71	0.84	3.5	20.9	5.36
GoMo-C105	2006	1	58.6	84.5	4.53	11.9	21.59	1.64	0.77	4.4	16.92	7.97
GoMo-C105	2006	2	65	82.07	4.64	11.9	21.47	1.6	0.56	5.05	18.54	7.51
GoMo-C105	2006	3	70	80.82	5.4	11.7	20.74	1.81	0.66	5.19	18.75	8
GoMo-C106	2006	1	54	70.14	3.76	14.1	18.99	1.82	0.8	5.22	18.07	5.62
GoMo-C106	2006	2	65.4	75.76	6.22	13.8	20.59	1.76	0.78	7	18.13	6.76
GoMo-C106	2006	3	50.8	73.98	6.97	14.4	17.8	1.78	0.84	7.13	18.28	6.59
GoMo-C108	2006	1	66.8	71.4	3.33	14.9	31.33	2	0.98	5.57	30.55	5.84
GoMo-C108	2006	2	64.5	71.09	6.26	15.8	29.87	2.02	1.07	6.46	30.07	5.8
GoMo-C108	2006	3	59.4	71.48	7	14.9	31.87	1.82	0.84	6.42	23.54	5.33
GoMo-C109	2006	1	45.7	77.44	8.14	14.2	39.58	1.14	0.69	5.28	23.88	8.89
GoMo-C109	2006	2	43.5	74.04	7.12	16.3	41.05	1.29	0.85	6.63	29.4	9.84
GoMo-C109	2006	3	53.3	73.19	9.19	14.9	33.14	1.18	0.69	6.71	27.9	12.88
GoMo-C111	2006	1	90.8	87.2	5.13	10.4	25	1.67	1.05	3.71	27.93	7.98
GoMo-C111	2006	2	89.9	87.36	5.84	10.8	22.94	1.69	1.13	3.82	24.81	6.32
GoMo-C111	2006	3	94.8	80.68	7.25	11.6	25.12	1.9	1.14	5.17	27.81	6.55
GoMo-C112	2006	1	52.5	79.73	6.77	13.7	30.11	1.62	0.7	3.85	29.86	6.17
GoMo-C112	2006	2	61.6	79.79	6.2	12.8	32.2	1.73	0.74	4.33	29.4	6.24
GoMo-C112	2006	3	62.1	76.85	7.2	14.5	30.07	1.48	0.49	4.78	28.39	4.33
GoMo-C113	2006	1	50.9	75.8	6.1	12.8	26.29	1.5	0.72	5.06	23.71	9.18
GoMo-C113	2006	2	52.4	73.26	6.52	14.8	20.47	1.55	0.81	6.94	19.15	5.36
GoMo-C113	2006	3	59.8	70.71	6.57	15.7	18.5	1.87	0.66	7.41	18.63	7.29
GoMo-A002	2007	1	60.9	72.88	4.88	13.9	31.04	1.55	0.83	5.89	25.31	8.06
GoMo-A002	2007	2	51.4	69.92	7.39	15.1	29.07	1.62	0.85	7.26	22.79	12.23
GoMo-A002	2007	3	66.6	71.32	7.88	15	26.33	1.52	0.8	7.78	20.9	8.34
GoMo-A003	2007	1	70.1	66.06	3.18	12.9	21.99	1.62	0.73	5.71	17.35	7.23
GoMo-A003	2007	2	63.2	66.18	4.56	14.1	19.29	1.83	0.75	6.81	15.05	6.89
GoMo-A003	2007	3	71.5	67.61	4.63	15	17.73	1.86	0.77	7.27	13.97	7.12
GoMo-A004	2007	1	42.1	75.91	3.74	13.6	22.15	2.7	1.55	4.55	16.85	10.13
GoMo-A004	2007	2	60.3	75.56	4.64	14.1	19.65	2.35	1.32	6.35	14.04	10.43
GoMo-A004	2007	3	54.1	78.84	4.42	15.6	18.09	2.92	1.57	6.26	10.93	11.04
GoMo-A005	2007	1	45.3	76.02	8.05	11.1	32.68	1.6	0.98	3.85	24.71	11.05
GoMo-A005	2007	2	50.4	70.98	8.97	12.8	32	1.63	1	5.47	24.1	12.56
GoMo-A005	2007	3	59.4	71.11	9.33	13.7	30.92	1.78	0.97	5.79	22.61	10.06
GoMo-A006	2007	1	59.2	73.86	4.09	15.4	28.62	1.87	0.85	7.15	22.74	11.01
GoMo-A006	2007	2	70.3	73.89	6.2	15	23.97	1.71	0.82	7.88	19.24	9.78
GoMo-A006	2007	3	71.2	72.32	7.14	16.3	23.87	1.91	0.88	8.37	19.81	8.71
GoMo-A007	2007	1	53.8	72.9	3.4	12.1	24.06	1.62	0.85	5.45	17.76	11.6
GoMo-A007	2007	2	62.5	72.39	3.76	11.8	23.62	1.58	0.83	5.61	18.13	10.45
GoMo-A007	2007	3	59.5	70.82	5.55	13.9	23.4	1.87	0.95	7.02	17.8	10.44
GoMo-A008	2007	1	50.7	87.04	7.21	12.3	25.24	1.43	0.8	5.39	23.22	7.19
GoMo-A008	2007	2	47.3	86.35	8.11	12.7	22.64	1.48	0.88	5.95	20.99	7.18
GoMo-A008	2007	3	57.7	82.23	8.76	13	22.99	1.37	0.82	6.51	20.79	7.11
GoMo-A009	2007	1	47	70.44	3.3	15.6	23.04	2.03	1.05	6.1	21	8.09
GoMo-A009	2007	2	54.5	70.27	6.48	15	22.07	2.03	1.05	6.7	19.38	8.06
GoMo-A009	2007	3	56.6	69.57	7.51	15	21.44	1.85	1	7.2	19.64	7.15
GoMo-A010	2007	1	49.3	71.3	6.79	11.4	32.69	1.28	0.63	5.06	25.12	10.2
GoMo-A010	2007	2	54.8	69.76	7.66	12.1	32.5	1.2	0.6	5.52	25.98	11.06
GoMo-A010	2007	3	55.3	68.25	7.66	11.9	29.44	1.15	0.6	5.54	25.21	8.92
GoMo-A013	2007	1	62.3	77.54	6.47	10.7	24.79	1.57	0.67	4.79	20.89	7.74
GoMo-A013	2007	2	59.8	77.63	7.86	11.5	23.32	1.65	0.7	5.03	20.61	6.86
GoMo-A013	2007	3	65.4	75.39	8.14	11.7	21.61	1.48	0.63	5.76	18.48	11.97
GoMo-A014	2007	1	60	85.57	7.32	12.9	33.98	1.88	0.82	5.35	28.56	8.33
GoMo-A014	2007	2	58.4	85.81	8.35	14.3	32.27	2.09	0.85	6.59	28.37	8.04
GoMo-A014	2007	3	68.3	85.02	8.78	14.9	30.08	2.26	0.85	7.37	26.1	7.42
GoMo-A015	2007	1	54	80.24	4.03	16.8	22.19	2.21	0.97	8.33	17.35	11.54
GoMo-A015	2007	2	54.9	78.66	4.98	17.2	20.88	2.29	0.94	8.83	15.54	10.98
GoMo-A015	2007	3	55.2	75.74	7.14	17.5	19.49	2.27	0.94	9.21	15.76	8.86
GoMo-A016	2007	1	56.4	75.71	4.96	12.9	24.34	1.16	0.72	6.4	14.24	12.12
GoMo-A016	2007	2	65.5	74.54	6.07	13.8	24.04	1.26	0.75	6.83	15.07	11.1
GoMo-A016	2007	3	63.9	68.84	6.57	15.7	21.64	1.4	0.85	8.34	14.73	9.58
GoMo-A017	2007	1	74.9	69.98	7.6	13.3	26.28	1.63	0.59	6.92	21.36	9.17
GoMo-A017	2007	2	78.3	70.77	8.56	13.3	25.27	1.56	0.5	6.84	20.76	8.71
GoMo-A017	2007	3	80.9	69.84	9.14	14.4	25.33	1.71	0.54	7.42	20.71	8.27
GoMo-A018	2007	1	65.3	72.64	7.16	12.1	30.72	1.58	0.84	5.03	28.12	7.38
GoMo-A018	2007	2	60.1	74.28	7.53	13	30.9	1.67	0.82	5.3	28.35	8.33
GoMo-A018	2007	3	76.2	75.18	6.7	12.1	31.8	1.75	0.93	5.94	27.5	7.76
GoMo-A019	2007	1	62.3	78.49	5.12	13.9	23.21	1.84	1.02	7.43	18.99	8.03
GoMo-A019	2007	2	68.4	80.04	5.45	13	23.21	1.66	0.89	5.99	18.31	8.3
GoMo-A019	2007	3	60.5	78.57	5.73	16.3	22.9	1.71	0.93	6.06	20.39	7.49
GoMo-A020	2007	1	58.6	78.1	5.91	16	22.74	2.23	1.12	7.83	17.06	9.78
GoMo-A020	2007	2	61.7	76.52	6.77	16	24.48	2.12	1.2	8.62	19.31	9.52
GoMo-A020	2007	3	60.1	74.75	6.87	19	26.3	2.34	1.13	9.7	20.76	10.82
GoMo-A021	2007	1	41.4	71.09	4.2	13	26.32	1.55	0.74	5.8	21.36	8.71
GoMo-A021	2007	2	55.7	71	4.69	12.6	23.97	1.67	0.65	5.83	23.24	7.18
GoMo-A021	2007	3	45.4	72.65	7.13	14	21.33	1.91	0.92	8.75	18.99	9.17
GoMo-A022	2007	1	51.6	68.73	6.31	13.1	24.92	1.36	0.96	6.51	22.8	7.95
GoMo-A022	2007	2	57.1	66.52	7.7	13.7	26.91	1.3	0.95	7.08	24.08	8.96
GoMo-A022	2007	3	60.5	67.45	8.17	13.8	25.05	1.19	0.82	7.33	22.7	8.62
GoMo-A023	2007	1	51.7	75.69	4.62	17.1	21.71	1.98	0.87	9.42	17.35	11.24
GoMo-A023	2007	2	58.4	72.79	5.39	17.7	19.05	2.14	0.97	9.98	14.94	10.11
GoMo-A023	2007	3	59.2	73.98	5.62	17.2	20.29	2.12	0.85	9.75	16.5	10.7
GoMo-A024	2007	1	56.7	72.58	5.16	15.4	32.65	1.66	0.82	7.57	29.07	10.05
GoMo-A024	2007	2	56.4	70.95	5.85	15.8	30.55	1.66	0.82	7.88	28.88	9.49
GoMo-A024	2007	3	55.1	70.4	7.12	16.3	30.16	1.84	0.85	8.04	28.61	9.8
GoMo-A025	2007	1	44.3	68.25	2.94	15.1	23.68	1.64	0.9	6.9	18.35	12.48
GoMo-A025	2007	2	57.5	68.43	4.32	15.4	21.88	1.46	0.78	7.82	17.88	11.69
GoMo-A025	2007	3	48.6	65.71	5.76	17.5	20.79	1.69	0.77	9.45	18.04	10.1
GoMo-A026	2007	1	51.5	77.43	7.57	11.3	21.12	1.22	0.52	5.24	20.51	7.12
GoMo-A026	2007	2	58.9	75.83	8.21	11.9	17.42	0.98	0.48	6.48	16.6	5.98
GoMo-A026	2007	3	65.5	70.92	8.54	13.1	15.03	1.02	0.59	7.72	14.56	5.62
GoMo-A027	2007	1	65.2	67.42	6.67	15.8	24.12	1.76	1.36	7.62	22.89	8.27
GoMo-A027	2007	2	56.1	67.57	5.89	15.7	25.32	1.8	1.43	7.23	24.39	8.07
GoMo-A027	2007	3	66.6	67.1	7.02	15.9	25.67	1.61	1.26	7.58	21.37	7.1
GoMo-A028	2007	1	52.4	83.35	7.63	13.2	26.43	1.62	0.8	5.6	25.9	5.96
GoMo-A028	2007	2	51.3	80.68	8.35	14.2	27.37	1.65	0.91	6.19	27.46	6.19
GoMo-A028	2007	3	53.7	80.82	8.43	14.5	26.45	1.61	0.67	6.02	25.38	5.62
GoMo-A029	2007	1	60.7	69.24	4.19	14.8	29.64	1.86	1.22	8.01	21.7	14.51
GoMo-A029	2007	2	64.1	66.86	5.29	16	25.54	1.71	1.13	8.19	18.15	11.01
GoMo-A029	2007	3	69.8	66.35	5.61	16.1	25.33	1.7	1.12	8.45	18.53	10.45
GoMo-A030	2007	1	43.1	83.97	3.56	12.6	25.49	1.2	0.7	5.8	16.25	11.94
GoMo-A030	2007	2	49.7	78.09	4.01	13.9	22.47	1.43	0.73	7.08	13.44	12.24
GoMo-A030	2007	3	50.3	78.7	4.25	14.1	21.67	1.5	0.75	7.39	12.46	11.6
GoMo-A031	2007	1	68	76.62	4.08	12.4	24.47	1.85	0.46	5.72	17.46	10.35
GoMo-A031	2007	2	60.2	75.21	5.4	13	25.33	1.72	0.48	6.26	16.66	10.13
GoMo-A031	2007	3	56.7	71.51	6.96	13.9	20.46	2.04	0.47	6.84	14.9	9.49
GoMo-A032	2007	1	54.4	68.62	3.97	15.9	26.8	1.71	1.02	6.96	15.48	11.83
GoMo-A032	2007	2	65.4	68.93	3.83	15.7	25.43	1.62	1	7.68	15.91	12.22
GoMo-A032	2007	3	59.9	67.85	4.28	16.2	22.5	2.11	1.14	8.41	18.04	12.77
GoMo-A033	2007	1	58.6	78.87	5.91	9.9	24.79	1.63	0.97	4.33	21.36	8.28
GoMo-A033	2007	2	57	76.52	7.56	10.6	24.29	1.67	0.97	4.4	20.53	8.02
GoMo-A033	2007	3	60.8	75.72	8.02	10.6	22.74	1.64	0.92	4.97	19.94	7.74
GoMo-A034	2007	1	97.8	74.94	7.43	11.9	34.44	1.43	0.71	5.29	29.58	8.83
GoMo-A034	2007	2	92	73.67	7.97	12.5	33.61	1.55	0.72	5.83	28.7	5.36
GoMo-A034	2007	3	94.8	73.42	8.11	12.5	31.39	1.86	0.88	8.5	27.51	7.88
GoMo-A035	2007	1	72.9	72.11	7.59	10.3	26.16	1.64	0.64	5.56	24.18	9.18
GoMo-A035	2007	2	61.7	69.39	8.2	10.7	22.45	1.49	0.6	5.42	20.46	6.22
GoMo-A035	2007	3	75	67.89	8.81	11.4	23.35	1.4	0.49	5.8	23.07	6.76
GoMo-A037	2007	1	73.5	86.23	5.42	11.1	21.53	1.66	0.42	5.46	17.95	6.5
GoMo-A037	2007	2	69.3	83.13	7.39	11.7	19.66	1.75	0.49	5.61	17.53	6.17
GoMo-A037	2007	3	79.3	82.2	7.62	12.1	18.1	1.8	0.45	6.51	16.25	6.27
GoMo-A038	2007	1	58.1	78.75	4.72	14.6	28.1	1.6	1.03	7.46	18.75	14.63
GoMo-A038	2007	2	68.1	81.43	5.53	14.7	28.2	1.87	1.18	8.6	21.53	17.92
GoMo-A038	2007	3	64.3	74.09	6.4	15.1	26.37	1.63	0.96	8.34	19.72	12.65
GoMo-A039	2007	1	66	64.77	6.11	12.7	26.33	1.81	1.05	6.65	21.43	11.7
GoMo-A039	2007	2	79.9	65.83	5.97	12.7	25.46	1.79	1.09	7.8	18.97	9.51
GoMo-A039	2007	3	68.2	64.62	6.43	14	25.24	1.79	1.14	7.91	18.93	9.65
GoMo-A041	2007	1	62.2	70.48	4.48	14.8	28.68	1.39	0.64	7.29	25.07	6.21
GoMo-A041	2007	2	67	68.63	6.4	15.5	29.17	1.49	0.65	8.06	25.77	6.3
GoMo-A041	2007	3	66.5	67.57	6.98	16.2	26.32	1.44	0.58	8.52	23.63	6.32
GoMo-A042	2007	1	54.9	86.88	6.08	12.8	23.46	2.01	0.64	5.62	20.79	7.3
GoMo-A042	2007	2	53.3	85.74	7.08	13.3	23.48	2.15	0.77	5.88	20.23	6.63
GoMo-A042	2007	3	52.9	83.06	7.73	13.6	22.36	2.05	0.66	6.21	19.2	4.37
GoMo-A043	2007	1	46.7	68.29	5.32	12.5	24.07	1.35	0.6	6.69	21.71	6.05
GoMo-A043	2007	2	49.7	68.3	5.52	12.4	21.58	1.31	0.57	7.28	19.16	6.2
GoMo-A043	2007	3	58.3	69.12	6.78	12.3	21.84	1.22	0.41	6.81	19.42	5.71
GoMo-A044	2007	1	73.2	74.84	4.98	12.1	27.05	1.36	0.52	6.12	23.52	5.03
GoMo-A044	2007	2	70.4	72.28	6.82	13	25.11	1.52	0.51	6.85	21.94	5.46
GoMo-A044	2007	3	78.6	70.6	7.99	14.1	26.4	1.62	0.54	7.94	23.65	4.69
GoMo-A045	2007	1	36.1	74.56	5.19	12.5	25.14	1.79	0.92	4.97	21.2	5.79
GoMo-A045	2007	2	39.7	75.42	7.19	12.6	24.47	1.58	0.78	5.93	21.03	6.11
GoMo-A045	2007	3	41.4	71	7.42	13.2	25.11	1.53	0.78	6.49	21.81	6.65
GoMo-A046	2007	1	68	72.27	2.94	12.9	22.13	1.28	0.75	5.94	18.13	8.06
GoMo-A046	2007	2	73.5	69.98	3.83	14.7	20.36	1.39	0.82	7.56	15.24	8.62
GoMo-A046	2007	3	69.6	67.9	4.92	15.9	21	1.44	0.84	8.47	17.33	8.57
GoMo-A047	2007	1	61.6	71.36	3.3	13.8	25.7	1.11	0.66	4.96	21.84	8.23
GoMo-A047	2007	2	62.3	69.09	4.39	14.7	23.06	1.28	0.8	7.64	19.15	7.8
GoMo-A047	2007	3	71.9	68.97	5.83	17.4	21.59	1.53	0.86	9.38	16.97	7.96
GoMo-A048	2007	1	42.9	79.95	5.34	12.8	28.29	1.39	0.92	4.35	26.12	6.24
GoMo-A048	2007	2	41.2	76.61	7.27	13.1	25.66	1.31	0.9	5.68	21.98	5.4
GoMo-A048	2007	3	46.2	75.76	7.84	12.1	23.09	1.31	0.87	5.59	21.02	5.31
GoMo-A049	2007	1	36.9	71.48	3.81	11.6	37.68	0.62	0.25	5.58	29.93	12.67
GoMo-A049	2007	2	30.6	72.73	5.06	11.9	38.69	0.6	0.3	7.19	26.44	12.18
GoMo-A049	2007	3	38.9	71.39	6.43	10.8	38.05	0.54	0.22	5.1	32.81	8.46
GoMo-A051	2007	1	43	84.39	8.2	11.9	21.63	1.68	0.58	5.92	19.47	5.81
GoMo-A051	2007	2	48.7	79.39	8.52	12.7	19.79	1.83	0.59	6.58	18.54	5.31
GoMo-A051	2007	3	59.4	81.5	8.65	13.7	18.2	1.64	0.58	6.66	15.48	5.91
GoMo-A052	2007	1	45.7	82.5	8.22	12	22.52	1.69	0.58	5.24	20.71	8.27
GoMo-A052	2007	2	52.3	82.24	8.12	11.9	20.89	1.48	0.72	5.8	17.76	7.02
GoMo-A052	2007	3	51.1	79.79	8.6	13.1	18.99	1.7	0.67	6.36	12.08	5.19
GoMo-A053	2007	1	51.2	69.33	6.64	15.1	22.45	2.34	0.85	8	22.12	8.03
GoMo-A053	2007	2	48	69.56	7.1	14.1	23.17	1.75	0.68	6.52	20.03	6.88
GoMo-A053	2007	3	56.4	66.83	7.97	15.4	19.36	1.75	0.67	8.07	16.05	6.48
GoMo-A054	2007	1	61.3	70.55	4.98	13.7	21.53	1.6	0.81	5.2	18.99	7.86
GoMo-A054	2007	2	57.6	70.13	7	14	20.71	1.44	0.81	6.25	16.43	7.85
GoMo-A054	2007	3	77	70.05	8.18	15	20.83	1.54	0.81	6.76	15.15	7.23
GoMo-A055	2007	1	72.4	77.7	4.88	11.6	24.16	1.03	0.98	5.49	16.46	5.34
GoMo-A055	2007	2	78.2	75.73	6.36	12.8	22.4	1.22	0.75	5.93	17.59	5.6
GoMo-A055	2007	3	75	76.11	7.73	13.4	18.88	1.29	0.79	6.55	17.56	5.69
GoMo-A056	2007	1	31.7	84.09	6.32	12.7	24.32	1.31	0.87	5.79	18.5	9.88
GoMo-A056	2007	2	42.7	82.59	7.77	13.2	21.52	1.41	0.85	6.3	16.33	9
GoMo-A056	2007	3	40.7	80.21	8.82	13.6	20.53	1.42	0.88	6.5	15.45	7.97
GoMo-A057	2007	1	74.5	75.76	3.76	14.6	27.69	1.63	0.93	6.71	18.01	12.68
GoMo-A057	2007	2	90.8	75.47	4.49	15	26.62	1.64	0.86	7.33	18.45	13.29
GoMo-A057	2007	3	87.7	72.76	6.81	16.6	22.94	1.72	0.97	8.1	15.14	9.45
GoMo-A058	2007	1	50.3	82.99	4.5	11.5	30.48	2.11	3.44	5.49	29.52	10.5
GoMo-A058	2007	2	58.5	80.77	6.74	12.4	26.81	1.61	0.72	5.03	22.58	8.05
GoMo-A058	2007	3	58	78.04	8.37	14.1	24.56	2.04	0.83	6.61	20.79	7.22
GoMo-A059	2007	1	50.2	72.54	4.7	13.5	30.13	1.35	0.82	6.53	23.05	9.82
GoMo-A059	2007	2	49.8	73.29	5.78	15.1	28.41	1.56	0.87	6.97	21.39	9.77
GoMo-A059	2007	3	52.1	73.82	6.77	15.7	29.37	1.58	0.93	7.97	23.24	9.9
GoMo-A061	2007	1	59.6	73.75	8.32	9.9	24.99	1.15	0.42	4.18	28.43	5.84
GoMo-A061	2007	2	63.3	72.55	9.07	10.4	24.75	1.18	0.44	4.71	24.53	5.27
GoMo-A061	2007	3	65	69.69	9.5	11.1	21.8	1.39	0.42	5.04	21.08	5.03
GoMo-A062	2007	1	64	72.75	3.09	14.6	26.17	1.69	1.15	6.32	20.79	9.93
GoMo-A062	2007	2	54.3	72.44	3.53	15.7	23.58	1.83	1.24	7.33	18.85	9.15
GoMo-A062	2007	3	63.5	69.64	4.53	16.4	21.39	1.84	1.24	7.68	17.05	8.88
GoMo-A063	2007	1	76.6	76.52	6.97	13.1	26.37	1.77	0.85	5.22	20.66	9
GoMo-A063	2007	2	79.8	74.23	6.76	12.2	22.7	1.84	0.8	4.88	22.11	10.7
GoMo-A063	2007	3	88.7	74.09	8.06	14.1	21.14	1.92	0.74	6.43	18.91	7.74
GoMo-B001	2007	1	44.9	73.55	8.48	11.3	22.02	1.31	0.86	4.88	15.73	8.41
GoMo-B001	2007	2	54.3	69.11	8.94	13.9	21.95	1.36	0.9	7.02	16.01	9
GoMo-B001	2007	3	52.8	69	8.76	14.7	21.14	1.64	1.03	7.36	16.98	8.41
GoMo-B002	2007	1	56.3	75.8	8.07	12.9	30.34	1.32	0.82	5.47	28.47	6.01
GoMo-B002	2007	2	57.2	72.54	9.19	12.8	26.78	1.47	0.88	6.39	24.53	6.44
GoMo-B002	2007	3	58.7	72.15	9.19	13.4	27.27	1.37	0.82	6.85	24.57	6.83
GoMo-B005	2007	1	78.2	67.43	7.32	15	28.72	1.19	0.8	7.37	24.88	9.51
GoMo-B005	2007	2	62	65.82	8.09	15.4	26.74	1.21	0.77	7.28	23.8	9.15
GoMo-B005	2007	3	87.9	67.32	7.96	15.8	26.15	1.26	0.79	7.63	23.41	8.53
GoMo-B006	2007	1	48.7	76.01	7.54	13.9	30.25	1.63	0.83	5.26	25.78	7.82
GoMo-B006	2007	2	56.2	74.37	7.96	13.8	30.62	1.51	0.86	5.56	25.47	8.02
GoMo-B006	2007	3	50	74.49	8.83	13	27.45	1.43	0.73	6.37	24.38	7.46
GoMo-B007	2007	1	56.2	71.51	6.44	13.6	30.42	1.58	0.9	6.28	25.04	8.07
GoMo-B007	2007	2	56.9	69.95	7.2	13.7	28.37	1.65	0.91	6.52	24.07	7.07
GoMo-B007	2007	3	65.1	69.44	7.2	13.6	28.73	1.62	0.85	6.53	24.61	7.14
GoMo-B008	2007	1	63.1	85.72	6.09	11.8	25.31	1.4	0.55	5.58	22.89	6.59
GoMo-B008	2007	2	68.4	84.75	7.68	11.6	25.11	1.29	0.5	5.5	21.36	5.32
GoMo-B008	2007	3	69.2	80.71	8.84	12.7	23.36	1.44	0.52	5.95	24.53	6.23
GoMo-B009	2007	1	52.8	79.45	7.47	11.7	24.14	1.46	0.83	4.73	22.96	7.81
GoMo-B009	2007	2	48	80.84	7.82	12.2	24.29	1.55	0.86	5.06	24.95	7.95
GoMo-B009	2007	3	52.4	76.86	8.17	12.2	24.11	1.33	0.73	5.19	22.3	9.87
GoMo-B010	2007	1	56.3	75.44	5.82	14.2	34.95	1.47	0.9	5.54	27.72	11.9
GoMo-B010	2007	2	59.1	73.38	7.55	14.5	29.1	1.52	0.82	6.31	24.34	9.84
GoMo-B010	2007	3	57.8	72.12	8.68	15.2	29.84	1.4	0.73	6.86	26.96	8.39
GoMo-B011	2007	1	58.8	79.06	3.95	11.3	37.86	1.54	0.65	5.11	29.86	12.48
GoMo-B011	2007	2	68.9	76.85	5.92	11.3	35.45	1.45	0.58	4.81	26.61	11.36
GoMo-B011	2007	3	79.7	76.75	7.27	12	35.45	1.5	0.59	5.84	26.76	11.46
GoMo-B014	2007	1	69	83.62	7.1	13	31.22	1.6	0.98	5.66	25.04	11.06
GoMo-B014	2007	2	76.9	82.27	7.8	12.8	28.28	1.55	0.95	5.74	23.71	8.94
GoMo-B014	2007	3	80.6	80.72	7.95	13.7	26.66	1.68	0.98	6.32	22.81	8.96
GoMo-B016	2007	1	63	79.56	7.37	11.7	33.03	1.46	0.96	4.41	31.16	6.19
GoMo-B016	2007	2	62.4	77.33	8.51	13	30.46	1.55	0.99	5.39	28.04	5.3
GoMo-B016	2007	3	74.3	75.26	8.61	13	28.73	1.57	1	5.41	25.9	5.36
GoMo-B018	2007	1	39.4	67.91	4.75	16.9	26.69	2.27	1.61	7.33	20.4	13.87
GoMo-B018	2007	2	45.6	68.2	4.77	16.6	25.11	2.19	1.52	7.61	16.89	12.61
GoMo-B018	2007	3	45.7	66.15	5.24	17.1	27.22	2.22	1.65	7.59	19.34	11.92
GoMo-B020	2007	1	73.2	68.22	7.04	15.2	20.32	1.66	1.05	7.13	18.28	6.99
GoMo-B020	2007	2	82	69.71	7.39	14.8	17.32	1.71	0.99	7.6	14.28	6.53
GoMo-B020	2007	3	70.3	69.38	8.41	15.8	17.47	1.82	1.13	7.62	14.76	6.46
GoMo-B021	2007	1	72.6	70.74	5.51	15.6	26.3	1.79	1.24	7.12	22.32	8.59
GoMo-B021	2007	2	72.9	71.96	3.61	15.8	25.38	2.06	1.4	7.24	16.89	7.04
GoMo-B021	2007	3	77.9	69.59	4.86	17.5	24.2	1.82	1.27	8	20.56	8.63
GoMo-B022	2007	1	63.8	79.71	4.2	12.2	30.74	1.22	0.64	5.42	22.01	11.55
GoMo-B022	2007	2	69.3	75.21	6.82	13.2	31.11	1.35	0.73	6.6	23.13	11.34
GoMo-B022	2007	3	67	76.71	7.01	13.2	29.59	1.44	0.74	6.31	20.77	10.66
GoMo-B024	2007	1	42.7	67.15	5.09	15.2	22.64	1.76	1.15	6.12	15.63	11.77
GoMo-B024	2007	2	57.4	67.5	5.56	15.6	22.35	1.66	1.07	7.87	16.43	11.85
GoMo-B024	2007	3	56	65.27	5.05	15.7	21.71	1.8	0.97	8.05	18.56	12.5
GoMo-B025	2007	1	61.2	68.06	3.3	14.1	22.36	1.27	0.72	6.35	20.74	9.19
GoMo-B025	2007	2	62.7	67.06	3.26	15.4	19.07	1.33	0.7	7.15	17.59	8.4
GoMo-B025	2007	3	65.8	66.54	5	16	18.96	1.31	0.77	7.56	17.92	8.86
GoMo-B027	2007	1	45.9	75.26	7.36	13.1	27.87	1.24	0.64	5.23	22.94	10.66
GoMo-B027	2007	2	49.8	72.33	8.36	14.1	25.96	1.44	0.73	6.03	20.48	10.53
GoMo-B027	2007	3	49.3	72.65	8.59	14.4	27.61	1.15	0.6	6.58	22.74	10.41
GoMo-B028	2007	1	84.2	75.27	7.55	12.7	33.79	1.51	1.03	5.45	32.08	5.71
GoMo-B028	2007	2	81.4	74.46	7.98	12	33.83	1.23	0.75	5.27	32.5	4.78
GoMo-B028	2007	3	88.2	73.98	8.41	12	33.82	1.17	0.75	5.3	31.46	4.46
GoMo-B029	2007	1	51.1	69.85	4.63	15.3	25.08	1.39	0.91	6.8	19.53	12.34
GoMo-B029	2007	2	48.9	66.75	5.76	15.4	21.91	1.46	0.98	7.27	16.67	11.42
GoMo-B029	2007	3	43.8	66.54	6.57	16.5	20.17	1.67	1.12	8.62	15.89	10.41
GoMo-B030	2007	1	41.9	66.4	7.99	16	30.44	1.04	0.88	8.17	24.34	9.66
GoMo-B030	2007	2	49.5	66.35	8.66	16.5	23.85	1.23	0.95	9.98	21.88	8.96
GoMo-B030	2007	3	47.7	65.7	8.98	17.1	25.4	1.15	0.93	9.01	20.69	7.79
GoMo-B034	2007	1	50.8	79.34	8.12	16.4	26.85	2.83	0.8	6.95	22.53	6.15
GoMo-B034	2007	2	56.3	78.78	7.06	15.7	28.09	2.76	0.81	11.05	25.92	6.94
GoMo-B034	2007	3	53.6	80.96	7.96	14.4	25.8	2.45	0.73	5.5	28.25	6.67
GoMo-B038	2007	1	32.7	77.43	7.01	19	27.35	2.05	1.21	7.91	21.26	13.24
GoMo-B038	2007	2	36.8	74.72	7.55	17.9	27.99	1.85	1.13	7.75	22.85	11.66
GoMo-B038	2007	3	33	75.58	8.61	18.3	27.32	1.86	1.11	8.78	20.72	10.8
GoMo-B039	2007	1	50.4	74.16	5.74	13.8	24.85	1.66	0.85	5.54	22.92	9
GoMo-B039	2007	2	52.5	74.18	7	14	24.31	1.65	0.88	6.18	22.54	9.27
GoMo-B039	2007	3	55.2	73.26	7.59	15.6	22.91	1.63	0.78	6.84	21.56	8.96
GoMo-B041	2007	1	64.3	79.26	3.47	15	21.41	1.43	0.68	6.7	19.69	7.76
GoMo-B041	2007	2	62.3	77.33	4.71	15.2	20.42	1.72	0.75	7.37	18.66	8.02
GoMo-B041	2007	3	70	72.72	5.78	15.6	18.71	1.6	0.7	8.16	17.78	6.85
GoMo-B042	2007	1	49.4	81.85	4.93	12.4	28.06	1.68	1.1	5.08	23.13	9.55
GoMo-B042	2007	2	58.9	78.69	6.23	12.7	25.38	1.66	1.09	5.57	20.8	8.31
GoMo-B042	2007	3	58.1	77.66	7.45	13.7	22.29	1.66	1.06	6.44	18.54	7.09
GoMo-B043	2007	1	53.5	72.81	6.33	14.2	27.55	1.57	1	6.78	24.96	9.84
GoMo-B043	2007	2	53.6	71.59	8.31	15.2	24.92	1.45	0.98	6.94	22.5	8.96
GoMo-B043	2007	3	55.5	70.23	8.79	15.3	23.74	1.45	0.98	7.52	21.91	8.07
GoMo-B044	2007	1	62.5	78.65	5.47	13.4	26.96	1.55	0.87	6.58	19.31	12.79
GoMo-B044	2007	2	68.7	74.63	6.4	13.3	25.17	1.66	0.83	6.65	17.93	12.02
GoMo-B044	2007	3	58.7	74.57	7.4	15.7	26.24	1.85	1	7.8	18.78	13.16
GoMo-B045	2007	1	45.3	79.88	5.98	17	26.54	2.27	1.16	7.64	22.53	10.61
GoMo-B045	2007	2	49	77.72	7.23	19.4	21.43	2.5	1.1	8.94	20.35	8.37
GoMo-B045	2007	3	48.8	80.59	7.52	18.6	22.27	2.13	0.99	9.11	19.98	9.09
GoMo-C001	2007	1	59.8	74.03	4.2	16	31.37	1.23	0.89	7.59	26.19	8.83
GoMo-C001	2007	2	58.9	71.75	6.75	16.1	28.35	1.3	0.88	8.14	24.41	8.07
GoMo-C001	2007	3	53.5	71.76	7.49	16.1	27.54	1.33	0.9	8.23	22.54	8.37
GoMo-C002	2007	1	57.6	69.37	3.97	13.7	25.86	1.83	1.2	5.53	18.5	9.88
GoMo-C002	2007	2	55.7	67.6	4.73	14.4	25.55	1.82	1.2	6.45	19.34	8.94
GoMo-C002	2007	3	60.2	66.83	4.67	14.8	23.32	1.91	1.16	6.73	17.64	8.28
GoMo-C003	2007	1	47.9	83.19	4.14	15.2	40.3	1.85	1.22	5.55	36.97	8.05
GoMo-C003	2007	2	54	82.93	5.23	15.7	35.72	1.8	1.16	5.57	33.27	7.06
GoMo-C003	2007	3	49.4	78.82	6.46	17.1	37.02	1.9	1.28	5.42	35.63	7.46
GoMo-C006	2007	1	60.4	73.97	3.56	13.6	29.77	1.4	1.05	5.27	27.81	9.55
GoMo-C006	2007	2	59.4	71.71	4.37	14.2	26.31	1.52	1.17	6.29	23.64	10.1
GoMo-C006	2007	3	68.1	71.93	7.12	15.2	23.8	1.38	1.11	7.24	21.19	8.8
GoMo-C007	2007	1	81.3	69.18	4.47	13.3	34.11	1.62	0.76	7	30.1	11.73
GoMo-C007	2007	2	70.4	69.21	4.44	12.2	31.72	1.22	0.61	5.35	26.33	7.9
GoMo-C007	2007	3	76.5	67.45	6.96	13.9	26.01	1.59	0.68	6.51	21.41	7.49
GoMo-C009	2007	1	57	76.8	6.23	12	28.63	1.31	0.59	5.36	27.86	6.8
GoMo-C009	2007	2	57	76.52	7.57	13.1	27.47	1.43	0.65	6.08	26.25	7.46
GoMo-C009	2007	3	59.6	72.43	8.27	13	25.57	1.41	0.55	5.99	24.57	6.62
GoMo-C010	2007	1	38.5	80.71	7.33	17.4	25.26	1.42	0.64	6.34	17.79	10.84
GoMo-C010	2007	2	40.9	76.69	7.59	16.6	25.5	1.75	0.98	6.76	17.84	10.46
GoMo-C010	2007	3	39.2	77.73	8.02	16.8	25.65	1.91	1.02	7.35	20.46	10.37
GoMo-C011	2007	1	36.8	73.25	7.7	12.2	29.84	1.29	0.7	4.94	29.17	5.51
GoMo-C011	2007	2	41.6	73.16	8.27	12.5	29.65	1.33	0.55	5.94	27.19	5.37
GoMo-C011	2007	3	38.6	71.29	8.62	13.9	28.44	1.64	0.5	6.6	27.99	5.41
GoMo-C012	2007	1	47.6	70.47	3.97	11.4	29.14	1.24	0.7	5.26	21.84	10.72
GoMo-C012	2007	2	47.3	68.82	4.16	11.6	29.44	1.44	0.72	5.18	21.36	10.64
GoMo-C012	2007	3	59.8	67.79	6.22	13.5	25.53	1.61	0.77	6.26	22.29	10.05
GoMo-C014	2007	1	68.9	69.75	5.62	12.7	21.58	1.79	0.7	5.62	17.87	6.94
GoMo-C014	2007	2	71.5	70.19	6.67	13.8	21.24	1.92	0.82	6.49	18.07	7.74
GoMo-C014	2007	3	76.4	69	7.8	15.3	20.25	1.94	0.72	7.77	16.82	7.44
GoMo-C016	2007	1	69.8	71.28	3.81	12.1	27.49	1.3	0.57	5.92	27.65	8.63
GoMo-C016	2007	2	59.2	73.82	5.58	11.7	23.31	1.05	0.4	6.15	14.11	5.09
GoMo-C016	2007	3	63.5	73.41	7.98	12.1	23.06	1.22	0.44	6.59	19.23	7.29
GoMo-C017	2007	1	42.8	69.47	5.01	11.5	21.85	1.51	0.66	4.91	17.37	9.32
GoMo-C017	2007	2	51.9	69.35	7.08	14.5	19.87	1.57	0.73	6.93	13.78	8.77
GoMo-C017	2007	3	54.3	68.47	7.9	15.4	18.94	1.38	0.66	7.29	13.53	8.81
GoMo-C018	2007	1	71.8	82.95	5.94	11.9	33.76	1.42	0.59	7.45	23.57	10.53
GoMo-C018	2007	2	80.8	79.68	6.75	12.9	33.18	1.27	0.54	6.76	24.08	10.19
GoMo-C018	2007	3	79.5	79.87	7.26	12.4	30.39	1.33	0.54	6.85	22.22	9.14
GoMo-C020	2007	1	65.3	70.71	7.16	13.5	21.24	1.63	0.46	5.55	17.34	10.17
GoMo-C020	2007	2	73.1	70.71	7.6	13.8	19.96	1.52	0.47	5.63	15	8.77
GoMo-C020	2007	3	67.6	71.03	8.08	14	19.62	1.53	0.53	5.31	14.28	8.71
GoMo-C023	2007	1	60.9	84.84	9.11	12.8	34.94	1.39	0.92	6.22	33.02	8.29
GoMo-C023	2007	2	60.4	82.31	8.69	11.6	33.5	1.15	0.71	5.06	31.64	7.59
GoMo-C023	2007	3	70.5	80.99	9.5	14.5	32.16	1.44	0.87	7	30.79	7.72
GoMo-C024	2007	1	36.4	65.57	5.12	15.6	18.85	1.33	0.64	7.76	12	9.7
GoMo-C024	2007	2	33.1	67.02	6.78	17.8	23.13	1.48	0.76	9.3	15.07	11.46
GoMo-C024	2007	3	40.7	67.26	6.68	16.6	21.57	1.38	0.67	8.97	15.14	10.33
GoMo-C025	2007	1	41	81.59	5.58	14.3	25	1.98	1.15	6.33	15	12.58
GoMo-C025	2007	2	44.8	72.19	5.76	15.8	22.12	2.03	1.17	7.25	13.76	11.39
GoMo-C025	2007	3	40.9	74	6.48	18.1	23.21	2.43	1.34	8.03	15.51	11.68
GoMo-C026	2007	1	49.1	73.39	6.18	13.3	34.68	1.19	0.66	6.39	27.12	12.81
GoMo-C026	2007	2	39.7	68.59	7.9	15.5	31.08	1.26	0.66	8.14	24.61	14.4
GoMo-C026	2007	3	55.5	69.43	8.48	14.2	30.74	1.26	0.64	7.35	26.8	10.89
GoMo-C027	2007	1	47	77.85	5.61	14.3	25.44	2.04	0.97	6.58	23.05	8.93
GoMo-C027	2007	2	56.7	76.37	5.7	13.8	24.52	2.08	0.84	5.84	23.25	8
GoMo-C027	2007	3	55	70.9	7.19	16	24.6	2.44	1.05	7.98	22.59	8.75
GoMo-C030	2007	1	37.1	67.68	5.49	16.8	27.95	1.71	0.87	8.75	24.45	10.64
GoMo-C030	2007	2	41.8	68.06	6.06	16.8	28.64	1.61	0.79	8.42	24.76	9.17
GoMo-C030	2007	3	37.7	67.33	7.74	19.2	26.01	1.73	0.98	10.69	22.81	9.25
GoMo-C031	2007	1	37.5	84.85	5.7	11.6	19	1.73	0.73	5.8	16.56	7.46
GoMo-C031	2007	2	39.5	80.99	6.69	12.1	20.31	1.86	0.64	5.39	18.34	7.01
GoMo-C031	2007	3	34.7	72.87	7.32	13.5	17.77	2.01	0.77	7.08	16.15	6.82
GoMo-C035	2007	1	58.6	84.91	3.87	12.7	26.18	1.57	0.52	6.5	19.97	10.43
GoMo-C035	2007	2	65.9	81.11	4.43	13	27.1	1.73	0.54	6.72	21.94	9.45
GoMo-C035	2007	3	58.4	77.09	5.53	14.4	22.25	2.08	0.63	7.46	18.13	8.06
GoMo-C036	2007	1	59.5	78.11	3.71	10.8	26.17	1.43	0.65	5.65	20.94	8.36
GoMo-C036	2007	2	57	77.05	4.01	12.2	24.12	1.7	0.74	6.09	19.72	7.95
GoMo-C036	2007	3	61.5	74.17	7.18	12.5	24.33	1.27	0.56	5.9	19.87	7.3
GoMo-C037	2007	1	47.5	72.43	6.16	9.8	26.78	1.52	0.73	4.88	25.63	8.96
GoMo-C037	2007	2	62.3	76.74	7.78	13.9	24.65	1.29	0.56	6.47	19.36	8.29
GoMo-C037	2007	3	48	69.25	7.8	15.2	22.16	1.52	0.81	7.39	20.46	8.28
GoMo-C041	2007	1	62	86.12	7.12	12.4	33.82	1.34	0.67	5.21	30.9	8.56
GoMo-C041	2007	2	71.1	82.81	8.04	13	31.41	1.3	0.65	6.01	27.41	8.33
GoMo-C041	2007	3	70.1	81.56	8.17	13.1	28.51	1.29	0.55	6.61	26.07	7.16
GoMo-C042	2007	1	59.3	81.16	3.83	14.2	20.64	1.1	0.77	7.05	16.2	9.22
GoMo-C042	2007	2	66.8	79.55	5.09	14.1	20.48	1.2	0.83	7.39	22.01	12.56
GoMo-C042	2007	3	63.4	77.01	6.84	14.6	18.96	1.02	0.74	7.63	20.46	11.6
GoMo-C048	2007	1	43.2	71.35	3.33	12	22.77	1.42	0.69	5.21	15.92	12.58
GoMo-C048	2007	2	43.1	69.1	4.54	13.6	24.62	1.39	0.78	6.72	17.37	13.39
GoMo-C048	2007	3	55.1	69.04	5.02	13.2	22.75	1.3	0.64	7.29	16.92	11.75
GoMo-C049	2007	1	71.9	76.23	4.03	11.2	24.86	1.37	0.62	5.01	30.48	8.91
GoMo-C049	2007	2	84.8	72.42	6.76	10.5	23.23	1.48	0.66	6.01	31.55	10.04
GoMo-C049	2007	3	82.9	71.73	7.14	11.5	20.22	1.38	0.54	5.52	24.85	7.91
GoMo-C050	2007	1	46.7	71.05	7.59	10.4	26.12	1.66	0.95	3.76	30.41	10.18
GoMo-C050	2007	2	47.5	69.08	8.43	11.2	23.48	1.72	1.03	4.3	27.63	9.21
GoMo-C050	2007	3	50.2	69.55	8.82	12	20.58	1.85	1.05	4.84	24.34	8.34
GoMo-C052	2007	1	51.6	84.96	5.56	10.5	29.26	1.41	0.73	5.37	22.55	10.48
GoMo-C052	2007	2	57.6	82.63	7.1	12.8	28.65	1.6	0.86	6.21	23.34	10.56
GoMo-C052	2007	3	53.5	80.82	7.75	13.7	29.39	1.41	0.74	6.95	23.8	10.92
GoMo-C053	2007	1	54.1	77.21	4.25	11.7	32.68	1.46	0.72	5.47	28.52	8
GoMo-C053	2007	2	59.1	76.74	5.2	12	32.33	1.64	0.72	5.77	28.34	8.06
GoMo-C053	2007	3	62.5	74.49	6.54	12.8	30.92	1.65	0.7	6	28.56	7.84
GoMo-C056	2007	1	49.3	73.65	4.37	13.6	23.23	1.71	0.92	5.3	21.43	8.77
GoMo-C056	2007	2	46.2	68.59	7.14	14.6	25.57	1.61	0.76	7.23	22.22	8.64
GoMo-C056	2007	3	65.7	68.06	8.04	14.5	21.85	1.59	0.65	7.8	19.53	7.11
GoMo-C060	2007	1	63.9	74.48	6.43	11.9	32.61	1.73	0.92	5.36	32.36	6.97
GoMo-C060	2007	2	69.5	72.65	7.67	12.8	31.58	1.64	0.82	5.48	28.3	6.24
GoMo-C060	2007	3	71.3	73.54	7.7	13.6	30.3	1.59	0.77	5.82	27.1	6.84
GoMo-C061	2007	1	44	83.42	5.03	13	31.74	1.32	0.82	5.36	28.39	8.34
GoMo-C061	2007	2	42.2	75.3	7.07	13.8	27.62	1.32	0.76	6.41	24.46	7.3
GoMo-C061	2007	3	44.8	72.59	7.34	13.6	27.3	1.32	0.72	6.56	23.91	7.71
GoMo-C062	2007	1	46.2	82.81	3.04	10.9	30.48	1.32	0.69	4.33	24.84	10.25
GoMo-C062	2007	2	46.8	78.86	3.47	11.9	30.21	1.4	0.7	4.99	22.19	10.15
GoMo-C062	2007	3	47.2	75.64	3.85	12.7	29.4	1.61	0.69	5.78	24.41	8.86
GoMo-C063	2007	1	54.3	74.05	3.04	12.8	32.2	1.35	0.73	5.37	26.56	8.96
GoMo-C063	2007	2	59.8	71.53	4.52	13.8	27.57	1.5	0.74	6.43	23.3	8.79
GoMo-C063	2007	3	54.5	69.73	7.29	14.6	26.29	1.62	0.7	7.21	22.46	8.34
GoMo-C064	2007	1	55.5	71.69	7.64	11.6	24.11	1.62	0.82	5.26	19.94	7.74
GoMo-C064	2007	2	53.4	72.2	7.93	11.9	22.77	1.58	0.77	5.17	19.78	6.79
GoMo-C064	2007	3	59.1	70.91	8.37	13	22.01	1.76	0.82	6.16	19.19	7.39
GoMo-C067	2007	1	40.5	88.21	6.45	15.6	36.95	1.76	1.14	6.39	27.51	12.1
GoMo-C067	2007	2	34.6	85.59	7.25	16.6	35.42	1.79	1.15	6.35	25.8	11.15
GoMo-C067	2007	3	33.1	82.36	7.83	16.2	33.75	1.72	1.2	6.26	26.21	11.03
GoMo-C069	2007	1	52.8	76.92	5	13.4	25.74	1.5	0.85	5.42	24.88	7.37
GoMo-C069	2007	2	51.1	76.52	7.61	14.3	26.22	1.53	0.87	7.6	21.07	9.78
GoMo-C069	2007	3	60.5	70.71	7.88	15.5	23.08	1.6	0.78	7.69	20.4	7.44
GoMo-C071	2007	1	45.3	76.55	4.99	13.2	32.68	0.88	0.88	5.23	24.39	13.87
GoMo-C071	2007	2	49.8	69.48	4.8	13.5	30.69	1.19	0.96	6.62	22.59	13.39
GoMo-C071	2007	3	57	77.35	5.54	13.9	28.75	1.06	0.95	6.66	22.5	11.75
GoMo-C072	2007	1	41.4	76.68	5.9	13.7	28.89	1.77	1.08	5.56	22.18	10.31
GoMo-C072	2007	2	40.9	74.83	7.22	14.7	23.52	1.82	0.95	5.64	19.5	9.16
GoMo-C072	2007	3	44.7	72.32	8.41	15.5	23.08	1.56	0.97	7.54	19.21	8.87
GoMo-C073	2007	1	56.8	87.84	6.29	10.7	33.47	1.48	0.76	5.2	20.64	11.77
GoMo-C073	2007	2	61.8	85.87	7.42	11.6	33.09	1.43	0.77	5.87	20.09	11.51
GoMo-C073	2007	3	62.6	84.28	7.92	12.4	31.68	1.64	0.87	6.31	17.46	11.5
GoMo-C074	2007	1	64.6	70.48	5.79	13.5	32.02	1.06	0.75	5.35	25.79	9.61
GoMo-C074	2007	2	67.1	71.55	7.59	14.2	29.65	1.16	0.75	6.79	24.42	8.29
GoMo-C074	2007	3	70.7	71.38	8.01	14.9	28.86	1.24	0.96	7.57	25.05	7.57
GoMo-C075	2007	1	38.7	70.59	6.81	13.4	27.63	1.83	0.83	5.7	31.56	8.06
GoMo-C075	2007	2	36.9	70.32	8.1	14.6	27.11	1.89	0.85	6.95	37.86	8.39
GoMo-C075	2007	3	34.7	70.52	8.56	15.3	25.21	1.98	0.89	7.12	29.76	7.11
GoMo-C077	2007	1	34.2	75.2	4.29	16.3	30.92	2.4	1.17	7.59	23.71	10.43
GoMo-C077	2007	2	36.6	76.63	5.7	16.2	30.87	2.04	0.99	6.88	25.49	10.35
GoMo-C077	2007	3	41.6	73.87	6.9	17	29.35	2.49	1.24	9.16	24.42	11.51
GoMo-C078	2007	1	49.8	79.68	4.28	13.1	30.5	1.52	0.84	5.16	22.24	10.05
GoMo-C078	2007	2	51.2	75.86	6.16	14.7	29.52	1.68	0.97	6.88	21.87	10.16
GoMo-C078	2007	3	53.6	78.04	6.26	14.7	28.72	1.75	0.97	6.83	21.22	10.43
GoMo-C080	2007	1	42.4	80.43	5.59	16	24.32	2.36	1.36	6.89	18.26	10.75
GoMo-C080	2007	2	44.7	80.29	6.97	16.1	26.4	2.26	1.29	6.97	20.36	9.87
GoMo-C080	2007	3	43.4	76.67	7.74	18.7	23.58	2.49	1.34	8.06	17.98	9.32
GoMo-C081	2007	1	44.4	72.41	6.38	12.9	29	1.47	0.7	6.19	25.19	6.83
GoMo-C081	2007	2	45.4	71.97	7.63	12.9	28.74	1.29	0.63	6.62	25.24	6.33
GoMo-C081	2007	3	49.9	69.37	8.45	13.7	26.84	1.35	0.6	6.46	25.31	5.67
GoMo-C083	2007	1	51.6	73.59	4.25	16.9	25.59	2.11	1.03	8.78	19.35	11.15
GoMo-C083	2007	2	50.6	74.12	5.14	17.2	24.75	2.04	0.95	8.38	18.07	11.01
GoMo-C083	2007	3	35.3	74.51	6.77	18.5	26.22	2.18	1.01	9.86	19.47	11.81
GoMo-C085	2007	1	33.6	83.7	7.7	11.5	31.31	1.61	0.46	4.49	45.26	6.99
GoMo-C085	2007	2	34.2	82.43	8.52	11.7	29.84	1.72	0.47	4.27	27.77	6.26
GoMo-C085	2007	3	33.5	79.31	9	12.6	28.02	1.74	0.45	4.77	27.06	6.24
GoMo-C086	2007	1	65.6	79.03	5.54	13.1	32.97	1.51	0.5	7.49	28.52	8.88
GoMo-C086	2007	2	60.2	76.29	6.96	14.1	32.89	1.47	0.55	7.58	27.72	9.82
GoMo-C086	2007	3	85.4	78.19	6.79	12.9	32.53	1.23	0.39	7.2	28.61	7.64
GoMo-C087	2007	1	37.1	73.44	4.58	14.6	32.28	1.57	0.57	5.76	29.81	7.12
GoMo-C087	2007	2	43.5	71.69	6.97	13.8	33.02	1.59	0.57	6.32	27.95	7.12
GoMo-C087	2007	3	37.9	71.15	7.9	14.6	33.15	1.71	0.53	6.07	29.56	6.91
GoMo-C089	2007	1	67.2	69.28	4.33	12	32.05	1.36	0.53	5.2	29.52	6.9
GoMo-C089	2007	2	75.1	67.34	7.17	12.5	30.22	1.43	0.55	6.09	27.86	6.28
GoMo-C089	2007	3	79.3	68.13	7.74	13.4	27.99	1.43	0.5	6.91	26.33	6.59
GoMo-C090	2007	1	40.8	81.21	4.57	15.2	37.62	1.52	0.37	5.01	27.68	13.07
GoMo-C090	2007	2	46.2	80.33	5.18	15.5	34.7	1.66	0.77	8.07	29.5	11.57
GoMo-C090	2007	3	49.7	79.43	5.91	17.5	32.55	1.59	0.72	8.23	24.88	10.4
GoMo-C093	2007	1	38.7	82.09	6.35	15.4	32.03	1.87	1.11	7.1	25.8	10.56
GoMo-C093	2007	2	46.4	80.48	7.09	15.5	30.29	1.76	1.02	6.36	26.04	8.88
GoMo-C093	2007	3	47.7	75.04	7.88	16.2	30.75	1.79	1.05	7.6	25.14	8.79
GoMo-C098	2007	1	61.3	73.18	5.77	13.1	29.97	1.55	1.08	6.1	25.39	11.98
GoMo-C098	2007	2	62.3	71.98	7.31	13.6	27.54	1.44	0.98	6.39	21.81	9.8
GoMo-C098	2007	3	63.8	70.62	7.98	13.7	28.51	1.27	0.82	5.41	21.84	8.94
GoMo-C099	2007	1	57	76.19	3	15.6	25.81	1.78	0.95	5.91	18.81	10.78
GoMo-C099	2007	2	55.8	74.64	3.5	17.4	24.9	2.07	1.01	6.68	18.33	12.38
GoMo-C099	2007	3	50.1	75.17	3.85	17.3	23.95	2.29	1.04	6.24	16.17	11.29
GoMo-C100	2007	1	34.5	84.39	5.4	11	26.01	1.4	0.87	3.54	21.07	15.55
GoMo-C100	2007	2	38.9	78.89	7.32	11.5	24.51	1.39	0.98	5.06	18.88	11.74
GoMo-C100	2007	3	37.8	77.67	8	12.1	23.09	1.6	0.93	5.12	16.11	9.69
GoMo-C101	2007	1	46.8	77	4.8	14.6	22.59	1.88	1.12	5.99	16.83	10.01
GoMo-C101	2007	2	47.5	74.77	5.05	14	23.09	1.84	1.11	6	18.11	10.51
GoMo-C101	2007	3	47.9	75.28	6.31	15.8	19.87	2.25	1.2	6.83	14.66	8.64
GoMo-C102	2007	1	37.5	69.01	5	11.9	26.56	1.6	0.6	4.88	21.53	7.15
GoMo-C102	2007	2	40.8	66.07	5.66	11.2	24.75	1.45	0.53	5.53	20.69	7.49
GoMo-C102	2007	3	46.4	66.6	6.91	11	24.23	1.52	0.47	5.72	21.43	5.85
GoMo-C103	2007	1	50.8	77.85	6.62	13.4	33.36	1.6	0.91	5.42	30.45	11.46
GoMo-C103	2007	2	49.3	74.74	8.19	14.5	29.31	1.76	0.98	6.25	26.06	9.6
GoMo-C103	2007	3	55.7	74	8.44	14.6	30.07	1.76	0.96	6.44	25.03	9.15
GoMo-C105	2007	1	53.9	86.95	4.08	11.5	30.69	1.19	0.63	4.89	23.27	8.98
GoMo-C105	2007	2	52.8	86	7.98	13.5	25.1	1.84	0.86	6.11	18.71	10.84
GoMo-C105	2007	3	55.8	85.01	8.16	14.1	24.87	1.95	0.96	6.58	18.64	10.34
GoMo-C106	2007	1	58.1	73.16	6.51	12.7	23.35	1.53	0.87	5.22	19.35	8
GoMo-C106	2007	2	62.3	71.71	7.6	14.1	22.16	1.5	0.81	8.41	19.78	8.06
GoMo-C106	2007	3	54.4	72.54	7	15	21.58	1.38	0.77	8.62	16.86	6.99
GoMo-C108	2007	1	56.9	69.44	5.42	13.3	33.54	1.5	0.62	6.27	30.14	6.76
GoMo-C108	2007	2	52.6	69.67	5.54	14.6	34.01	1.78	0.74	6.75	30.55	7.37
GoMo-C108	2007	3	60.5	68.8	7.32	14.5	33.84	1.57	0.7	7.82	30.89	7.75
GoMo-C109	2007	1	46.3	72.57	7.77	12.9	39.5	1.36	0.89	4.7	31.52	10.63
GoMo-C109	2007	2	43.8	71.42	8.56	12.9	39.02	1.36	0.89	4.89	32.5	8.87
GoMo-C109	2007	3	45.7	73.39	8.84	13.1	37.02	1.36	0.9	5.55	30.58	9.3
GoMo-C111	2007	1	82.2	82.52	5.41	9.8	30.11	1.63	0.94	3.58	24.76	8.28
GoMo-C111	2007	2	92.7	81.16	6.97	10.8	28.8	1.79	1.07	4.69	29.9	8.63
GoMo-C111	2007	3	90.8	77	8.04	11.5	28.23	1.8	1.02	5.13	26.78	7.27
GoMo-C112	2007	1	60.2	77.22	6.42	13.2	32.9	1.67	0.76	5	29.22	7.05
GoMo-C112	2007	2	51.6	74.28	7.85	13.4	29.29	1.61	0.72	5.73	26.27	6.2
GoMo-C112	2007	3	61	74.52	8.13	12.9	30.29	1.63	0.67	6.42	27.42	7.06
GoMo-C113	2007	1	55.9	72.03	6.31	14.3	24.52	1.6	0.78	4.55	20.08	8.41
GoMo-C113	2007	2	64.5	71.2	7.45	14.1	22.94	1.86	0.98	7.42	21.53	8
GoMo-C113	2007	3	47.8	64.99	7	14	19.63	1.95	0.93	7.46	19.73	6.94
